# Supplementary material
Source: publisher figshare collection journal article supplement (https://sage.figshare.com/ndownloader/files/12785060)
Supplement: Supplementary file 1 [file 12785060]

## Appendix: List of speeches analysed

|            |                                                                                                                                                                                                     |
|------------|-----------------------------------------------------------------------------------------------------------------------------------------------------------------------------------------------------|
| 02/06/2004 | Opportunities for Emerging and Developing Countries in International Standard Setting: An IMF Perspective, Luncheon Remarks by Agustín Carstens, Deputy Managing Director, IMF                      |
| 02/06/2004 | Economic Growth in a Shrinking World: The IMF and Globalization, Address by Anne Krueger, Acting Managing Director, IMF                                                                             |
| 03/06/2004 | Promoting International Financial Stability: the IMF at 60, Address by Anne Krueger, Acting Managing Director IMF                                                                                   |
| 04/06/2004 | Anti-Money Laundering and Combating the Financing of Terrorism: The Challenges Ahead, Remarks by Agustín Carstens, Deputy Managing Director, IMF                                                    |
| 04/06/2004 | Letting the Future In: India's Continuing Reform Agenda, Address by Anne O. Krueger, Acting Managing Director, IMF                                                                                  |
| 11/06/2004 | The Caribbean Economies: Adjusting to the Global Economy, Remarks by Anoop Singh, Director, Western Hemisphere Department, IMF                                                                      |
| 11/06/2004 | Opening Remarks by Deputy Managing Director, Mr. Takatoshi Kato, Given at the seminar on Developmental Challenges Facing the Caribbean                                                              |
| 12/06/2004 | The Role of the IMF in the Caribbean, Remarks by José Fajgenbaum, Deputy Director, Western Hemisphere Department, IMF                                                                               |
| 14/06/2004 | Improving the Policy Response to Financial Crisis, Remarks by Agustín Carstens, Deputy Managing Director, IMF                                                                                       |
| 14/06/2004 | The IMF at 60 -- Evolving Challenges, Evolving Role, Opening Remarks By Rodrigo de Rato y Figaredo, Managing Director, IMF                                                                          |
| 15/06/2004 | Trade, Jobs and Growth: Why You Can't Have One Without the Others, Address by Anne O. Krueger, First Deputy Managing Director, IMF                                                                  |
| 22/06/2004 | Crisis Resolution: What the Fund is Doing, Anne O. Krueger, First Deputy Managing Director, IMF                                                                                                     |
| 23/06/2004 | The IMF at 60: Equipped for Today's Challenges?, Address by Anne O. Krueger, First Deputy Managing Director, IMF                                                                                    |
| 24/06/2004 | The IMF at 60: What Role for the Future? Anne O. Krueger, First Deputy Managing Director, IMF                                                                                                       |
| 28/06/2004 | Remarks by Agustín Carstens, Deputy Managing Director, IMF at the Opening of the High-Level Segment of ECOSOC                                                                                       |
| 08/07/2004 | Opening Remarks by Mr. Agustín Carstens, Deputy Managing Director, IMF, given at the Third Regional Conference on Central America, San Pedro Sula                                                   |
| 09/07/2004 | Remarks by Mr. Rodrigo de Rato, Managing Director of the International Monetary Fund                                                                                                                |
| 12/07/2004 | Twenty Years Without a Crisis in Costa Rica: The IMF's View, Speech by Agustín Carstens, Deputy Managing Director, IMF                                                                              |
| 27/07/2004 | The Challenges Facing the IMF -- Speech by Agustín Carstens, Deputy Managing Director, IMF                                                                                                          |
| 06/08/2004 | Remarks by Mr. Rodrigo de Rato, Managing Director of the International Monetary Fund                                                                                                                |
| 21/08/2004 | "The Georgeous East": What the Asian Economies Can Teach the World, Keynote Address by Anne Krueger, First Deputy Director of the International Monetary Fund                                       |
| 25/08/2004 | Proving Keats Wrong: The IMF as a Guardian of International Financial Stability, Address by Anne O. Krueger, First Deputy Managing Director, IMF                                                    |
| 27/08/2004 | Virtuous in Old Age: How the IFIs Can Help Prepare for Demographic Change, Address by Anne O. Krueger, First Deputy Managing Director, IMF                                                          |
| 08/09/2004 | A Partnership for Growth and Poverty Reduction in Africa, Remarks by Rodrigo de Rato, IMF Managing Director                                                                                         |
| 10/09/2004 | De Tocqueville's "Dangerous Moment": The Importance Of Getting Reforms Right, Remarks by Anne O. Krueger, First Deputy Managing Director, IMF                                                       |
| 13/09/2004 | A Work In Progress: Building on the Achievements of the Transition Economies, Remarks by Anne O. Krueger, First Deputy Managing Director, IMF                                                       |
| 20/09/2004 | Remarks by Rodrigo de Rato, Managing Director of the IMF                                                                                                                                            |
| 20/09/2004 | The IMF at 60: Evolving Role, Current Challenges, Remarks by Rodrigo de Rato, IMF Managing Director                                                                                                 |
| 30/09/2004 | Remarks by Rodrigo de Rato, Managing Director of the IMF                                                                                                                                            |
| 01/10/2004 | Remarks by Rodrigo de Rato, Managing Director of the International Monetary Fund                                                                                                                    |
| 03/10/2004 | Concluding Remarks by Rodrigo de Rato, Chairman of the Executive Board and Managing Director of the International Monetary Fund                                                                     |
| 03/10/2004 | Address by Rodrigo de Rato, Managing Director and Chairman of the Executive Board, to the Board of Governors of the IMF                                                                             |
| 04/10/2004 | Opening Remarks by Anne O Krueger, First Deputy Managing Director, IMF                                                                                                                              |
| 06/10/2004 | Opening Remarks by Agustín Carstens, Deputy Managing Director, IMF                                                                                                                                  |
| 21/10/2004 | Emerging Asia: Outlook, Challenges, and India's Growing Role, David Burton, Director of the IMF's Asia and Pacific Department                                                                       |
| 22/10/2004 | Remarks by Agustín Carstens, Deputy Managing Director, IMF                                                                                                                                          |
| 22/10/2004 | Remarks by Rodrigo de Rato, Managing Director of the IMF                                                                                                                                            |
| 23/10/2004 | Remarks by Rodrigo de Rato, Managing Director of the IMF                                                                                                                                            |
| 25/10/2004 | Remarks by Rodrigo de Rato, Managing Director, IMF                                                                                                                                                  |
| 04/11/2004 | Agricultural Trade Reform: The Role of Economic Analysis, Remarks by Anne O. Krueger, First Deputy Managing Director, IMF                                                                           |
| 08/11/2004 | Remarks by Rodrigo de Rato, Managing Director of the International Monetary Fund                                                                                                                    |
| 08/11/2004 | Spreading Prosperity and Resisting Economic Divergence: The Significance of Richard Snape's Academic Legacy, Speech by Anne O. Krueger, First Deputy Managing Director, International Monetary Fund |
| 10/11/2004 | Banking Needs of A Global Economy, Keynote Address by Anne O. Krueger, First Deputy Managing Director, IMF                                                                                          |

|            |                                                                                                                                                                            |
|------------|----------------------------------------------------------------------------------------------------------------------------------------------------------------------------|
| 11/11/2004 | The Policy Response to Financial Crisis: The Importance of Facing Ugly Trade-offs, Remarks by Agustín Carstens, Deputy Managing Director, IMF                              |
| 17/11/2004 | Some Challenges Confronting the IMF, Remarks by Jack Boorman, Consultant, Office of the Managing Director, IMF                                                             |
| 22/11/2004 | Remarks by Agustín Carstens                                                                                                                                                |
| 22/11/2004 | Heeding Hippocrates: The IMF and the Reform Process, Address by Anne O. Krueger, First Deputy Managing Director, IMF                                                       |
| 24/11/2004 | The IMF: The Way Forward, Remarks by Rodrigo de Rato, Managing Director, IMF                                                                                               |
| 25/11/2004 | Benefits of Fiscal Consolidation, Remarks by Rodrigo de Rato, Managing Director of the IMF to the Real Academia de Doctores                                                |
| 25/11/2004 | Challenges and Opportunities in the New Europe, Remarks by Rodrigo de Rato, Managing Director of the IMF                                                                   |
| 26/11/2004 | Challenges and Opportunities in Latin America, Remarks by Rodrigo de Rato, Managing Director of the IMF                                                                    |
| 28/11/2004 | Opening Remarks by Takatoshi Kato, Deputy Managing Director, IMF                                                                                                           |
| 02/12/2004 | Can the East Asian Miracle Persist?, Remarks by Takatoshi Kato, Deputy Managing Director, IMF                                                                              |
| 04/12/2004 | Tackling Poverty and Delivering Growth: The Importance of a Sound Financial System, Remarks by Anne O. Krueger, First Deputy Managing Director, IMF                        |
| 06/12/2004 | Expanding Trade and Unleashing Growth: The Prospects for Lasting Poverty Reduction, Remarks by Anne O. Krueger, First Deputy Managing Director, IMF                        |
| 15/12/2004 | Remarks by Raghuram Rajan, Economic Counsellor and Director of the Research Department, IMF                                                                                |
| 07/01/2005 | India -- A Hub for Globalization, Remarks by Raghuram Rajan, Economic Counsellor and Director of the Research Department, IMF                                              |
| 10/01/2005 | China and the Global Economic Recovery, Keynote Address by Anne O. Krueger, First Deputy Managing Director, IMF                                                            |
| 12/01/2005 | Making Regional Economic Integration Work, Speech by Agustín Carstens, Deputy Managing Director, IMF                                                                       |
| 14/01/2005 | Shared Experience: What Reforming Economies Have in Common, Remarks by Anne O. Krueger, First Deputy Managing Director, IMF                                                |
| 27/01/2005 | The Role of Transparency and Accountability for Economic Development in Resource-rich Countries, Address by Agustín Carstens, Deputy Managing Director, IMF                |
| 03/02/2005 | New Roles for Banks in Algeria, Remarks by Jules Erik J. De Vrijer, Division Chief, Middle East and Central Asia Department, IMF                                           |
| 04/02/2005 | Latin America in the Global Economy--Challenges and Opportunities, Remarks by Rodrigo de Rato, Managing Director of the IMF                                                |
| 11/02/2005 | How Stable is the Global Economy? Speech by Anne O. Krueger, First Deputy Managing Director, IMF                                                                           |
| 23/02/2005 | Correcting Global Imbalances -- Avoiding the Blame Game, Remarks by Rodrigo de Rato, Managing Director, IMF                                                                |
| 23/02/2005 | Global Imbalances and Global Poverty - Challenges for the IMF Remarks by Rodrigo de Rato, Managing Director of the IMF                                                     |
| 01/03/2005 | Statement by Rodrigo de Rato, Managing Director of the International Monetary Fund, at the London Meeting on Supporting the Palestinian National Authority                 |
| 04/03/2005 | Latin America and the Global Economy: Prospects for Growth and Stability, Speech by Agustín Carstens, Deputy Managing Director, IMF                                        |
| 15/03/2005 | Opening Remarks by Rodrigo de Rato, Managing Director, International Monetary Fund                                                                                         |
| 15/03/2005 | Global Current Account Imbalances: Hard Landing or Soft Landing - Talk by Raghuram Rajan, Economic Counselor and Director of Research, International Monetary Fund         |
| 17/03/2005 | Transparency and Sound Macroeconomic Policies, Remarks by Mr. Takatoshi Kato, Deputy Managing Director, IMF                                                                |
| 17/03/2005 | Prospering in a Globalized Economy, Remarks by Rodrigo de Rato, Managing Director of the International Monetary Fund                                                       |
| 01/04/2005 | Capital Markets in a Global Economy--Recent Developments, Remarks by Rodrigo de Rato, Managing Director, IMF                                                               |
| 02/04/2005 | Convocation Address at the Indian Institute of Management by Raghuram Rajan, Economic Counselor and Director of Research, IMF                                              |
| 05/04/2005 | Bismarck's Warning: The Challenge of Economic Policy Reform in the Twenty-First Century, Anne O. Krueger, IMF First Deputy Managing Director                               |
| 05/04/2005 | Speaking Notes on the Global Financial Stability Report Press Conference, Gerd Häusler, Counsellor and Director of the International Capital Markets Department of the IMF |
| 06/04/2005 | Sustaining Global Growth and Stability -- The Role of the IMF, Remarks by Rodrigo de Rato, Managing Director of the International Monetary Fund                            |
| 18/04/2005 | 2005 Special High-Level Meeting of the ECOSOC with the Bretton Woods Institutions, the WTO and UNCTAD, Address by Mr. Agustín Carstens, Deputy Managing Director, IMF      |
| 19/04/2005 | Trade Policy and the Strategy for Global Insertion, Speech by Anne O. Krueger, First Deputy Managing Director, IMF                                                         |
| 20/04/2005 | Opportunities and Challenges for Economic Development in the Americas, Remarks by Rodrigo de Rato, Managing Director, IMF                                                  |
| 05/05/2005 | Turkey's Economy: A Future Full of Promise, Speech by Anne O. Krueger, First Deputy Managing Director, IMF                                                                 |
| 06/05/2005 | Central Bank of Turkey Conference: Macroeconomic Policies for EU Accession, Speech by Anne O. Krueger, First Deputy Managing Director, IMF                                 |
| 09/05/2005 | 'Tis Not Too Late to Seek a Newer World: What Globalization Offers the Poor, Address by Anne O. Krueger, First Deputy Managing Director, IMF                               |
| 10/05/2005 | Opening Remarks by Mr. Agustín Carstens, Deputy Managing Director, IMF, at the Domestic Capital Market Development Seminar                                                 |
| 12/05/2005 | The Financial Stability Assessment Framework of the IMF: Experience in Europe, Keynote Address by Mr. Takatoshi Kato, Deputy Managing Director, IMF                        |
| 13/05/2005 | Latin America: Short-Term Outlook and Medium-Term Challenges, Address by Anoop Singh, Director, Western Hemisphere Department, IMF                                         |

|            |                                                                                                                                                                                                       |
|------------|-------------------------------------------------------------------------------------------------------------------------------------------------------------------------------------------------------|
| 17/05/2005 | Capacity Building in Africa and the IMF's Role, Keynote Address by Rodrigo de Rato, Managing Director, IMF                                                                                            |
| 19/05/2005 | Opening Remarks by Mr. Agustín Carstens, Deputy Managing Director, International Monetary Fund                                                                                                        |
| 30/05/2005 | IMF Managing Director's Speech at the Opening Session of the ECLAC-IMF Round Table Seminar on Building Prosperity in Latin America and the Caribbean: Macroeconomic and Reform Priorities             |
| 08/06/2005 | The IMF in a Changing World, Keynote Address by Rodrigo de Rato, Managing Director of the International Monetary Fund                                                                                 |
| 09/06/2005 | The Time is Always Ripe: Rushing Ahead with Economic Reform in Africa, Lecture by Anne O. Krueger, First Deputy Managing Director, International Monetary Fund                                        |
| 09/06/2005 | A Brief Survey of Global Economic Developments, Remarks by Rodrigo de Rato, Managing Director of the International Monetary Fund                                                                      |
| 09/06/2005 | Address by Mr. Rodrigo de Rato, Managing Director of the International Monetary Fund, on the occasion of his acceptance of the New Economic Forum Award                                               |
| 10/06/2005 | The International Monetary Fund and Global Stability, Remarks by Rodrigo de Rato, Managing Director of the International Monetary Fund                                                                |
| 12/06/2005 | The Quality of Fiscal Adjustment, Remarks by Rodrigo de Rato, Managing Director of the International Monetary Fund                                                                                    |
| 15/06/2005 | Opening Remarks at the Conference on "Managing Fiscal Risks in Asia" by Mr. Agustín Carstens, Deputy Managing Director, International Monetary Fund                                                   |
| 16/06/2005 | Challenges and Perspectives of the Global Economy, Remarks by Rodrigo de Rato y Figaredo, Managing Director of the IMF                                                                                |
| 20/06/2005 | Global Imbalances and Poverty - Challenges for the World Economy, Remarks by Rodrigo de Rato y Figaredo, Managing Director of the IMF                                                                 |
| 27/06/2005 | Address by Mr. Agustín Carstens, Deputy Managing Director, International Monetary Fund                                                                                                                |
| 27/06/2005 | Remarks by Mr. Takatoshi Kato, Deputy Managing Director, International Monetary Fund                                                                                                                  |
| 29/06/2005 | Remarks by Agustín Carstens, Deputy Managing Director, IMF                                                                                                                                            |
| 30/06/2005 | Mutual Interdependence: Asia and the World Economy, Address By Anne O. Krueger, First Deputy Managing Director, IMF                                                                                   |
| 27/08/2005 | The Greenspan Era: Lessons for the Future, Speech by Raghuram G. Rajan, Economic Counsellor and Director of the IMF's Research Department                                                             |
| 09/09/2005 | Remarks by Agustín Carstens, IMF Deputy Managing Director, at the VIII Annual Assembly of Supervisors of Banks of the Americas                                                                        |
| 14/09/2005 | Remarks by IMF Managing Director Rodrigo de Rato at the High-Level Plenary Meeting of the UN General Assembly                                                                                         |
| 23/09/2005 | Remarks by Rodrigo de Rato, Managing Director of the International Monetary Fund, at Institute for International Economics Conference on IMF Reform                                                   |
| 24/09/2005 | Remarks by Rodrigo de Rato, Chairman of the Executive Board and Managing Director of the International Monetary Fund, to the Board of Governors of the IMF, at the Joint Annual Discussion            |
| 25/09/2005 | Concluding Remarks by Rodrigo de Rato, Chairman of the Executive Board and Managing Director of the International Monetary Fund                                                                       |
| 30/09/2005 | The Global Economic Outlook and Risks from Global Imbalances, Remarks by Rodrigo de Rato, IMF Managing Director                                                                                       |
| 07/10/2005 | Convinced By Commonsense -- Or Why We Need Economics, Keynote Address by Anne O. Krueger, First Deputy Managing Director, IMF                                                                         |
| 13/10/2005 | Global Context and Regional Outlook for Latin America and the Caribbean, Presented by Anoop Singh, Director, Western Hemisphere Department, IMF                                                       |
| 15/10/2005 | Opening Statement of IMF Managing Director Rodrigo de Rato, At the G-20 Finance Ministers Meeting Press Conference                                                                                    |
| 18/10/2005 | Speech by Rodrigo de Rato, Managing Director, International Monetary Fund, At the Meeting of the Ministers of Finance and Governors of the Cooperation Council of the Arab States of the Gulf         |
| 19/10/2005 | Financial Integration in Asia, Good Governance, and the IMF, Address by Mr. Takatoshi Kato, Deputy Managing Director of the International Monetary Fund                                               |
| 20/10/2005 | Globalization and the New Priorities of the IMF, Speech by Rodrigo de Rato, Managing Director, IMF                                                                                                    |
| 20/10/2005 | A Prize Worth Having: the IMF and Price Stability, Keynote Address by Anne O. Krueger, First Deputy Managing Director, IMF                                                                            |
| 21/10/2005 | The Role of the IMF in Safeguarding Global Financial Stability, Remarks by Rodrigo de Rato, Managing Director, International Monetary Fund, At the l'Institut International d'Etudes Bancaires (IIEB) |
| 25/10/2005 | Global Imbalances - An assessment, by Raghuram G. Rajan, Economic Counsellor and Director of the IMF's Research Department                                                                            |
| 25/10/2005 | The Global Economy and Challenges For Europe, Speech by Rodrigo de Rato, Managing Director, International Monetary Fund                                                                               |
| 25/10/2005 | How to Keep the Global Economy Growing, Speech by Rodrigo de Rato, Managing Director, International Monetary Fund                                                                                     |
| 03/11/2005 | Luncheon Remarks by Rodrigo de Rato, Managing Director of the International Monetary Fund, At the Sixth Jacques Polak Annual Research Conference                                                      |
| 03/11/2005 | Remarks on Global Current Account Imbalances and Financial Sector—Reform with examples from China, by Raghuram G. Rajan, Economic Counsellor and Director of the IMF's Research Department            |
| 03/11/2005 | Welcome Remarks by Mr. Agustín Carstens, Deputy Managing Director, IMF at the 6th Jacques Polak Annual Research Conference                                                                            |
| 03/11/2005 | Building Better Institutions, Remarks by Rodrigo de Rato, Managing Director, IMF                                                                                                                      |
| 04/11/2005 | Introductory Remarks at the International Symposium of the Banque de France, by Rodrigo de Rato, Managing Director, IMF                                                                               |
| 10/11/2005 | Global Imbalances and the Transatlantic Relationship, Remarks by Rodrigo de Rato, Managing Director of the International Monetary Fund                                                                |
| 17/11/2005 | From Despair to Hope: The Challenge of Promoting Poverty Reduction, A Lecture by Anne O. Krueger, First Deputy Managing Director, IMF                                                                 |
| 18/11/2005 | Remarks by Rodrigo de Rato, Managing Director of the International Monetary Fund, To the Frankfurt European Banking Congress                                                                          |
| 21/11/2005 | The Compendium and the socio-economic reality of America, Address by Mr. Agustín Carstens, Deputy Managing Director, International Monetary Fund                                                      |

|            |                                                                                                                                                                                                                         |
|------------|-------------------------------------------------------------------------------------------------------------------------------------------------------------------------------------------------------------------------|
| 21/11/2005 | Introductory Remarks by Rodrigo de Rato, Managing Director of the International Monetary Fund, At the Conference on Trade Facilitation in Algeria, Morocco, and Tunisia                                                 |
| 22/11/2005 | Problems and Issues in the Global Economy: A Call for Action, Speech by Rodrigo de Rato, Managing Director, International Monetary Fund                                                                                 |
| 01/12/2005 | Mutual Reinforcement: Economic Policy Reform and Financial Market Strength, Remarks by Anne O. Krueger, First Deputy Managing Director, IMF                                                                             |
| 08/12/2005 | Revitalizing Reforms in Europe, By Raghuram G. Rajan, Economic Counsellor and Director of the IMF's Research Department                                                                                                 |
| 13/12/2005 | Remarks by Anne O. Krueger, First Deputy Managing Director, IMF, for the Fund-Bank Panel on Aid for Trade                                                                                                               |
| 14/12/2005 | Still Achieving, Still Pursuing: The Global Consequences of Asian Growth, Remarks by Anne O. Krueger, First Deputy Managing Director, IMF                                                                               |
| 14/12/2005 | WTO Ministerial Meeting, Hong Kong, Address to the Plenary Session by Anne O. Krueger, First Deputy Managing Director, IMF                                                                                              |
| 16/12/2005 | At the Service of the Nations: The Role of the IMF in the Modern Global Economy, Keynote Address by Anne O. Krueger, First Deputy Managing Director, IMF                                                                |
| 08/01/2006 | Financial System Reform and Global Current Account Imbalances, Remarks by Raghuram Rajan, Economic Counselor and Director of Research, IMF                                                                              |
| 10/01/2006 | Brazil Resurgent, Remarks by Rodrigo de Rato, Managing Director, IMF                                                                                                                                                    |
| 20/01/2006 | India: The Past in its Future, Remarks by Raghuram Rajan, Economic Counselor and Director of Research Department, the International Monetary Fund                                                                       |
| 23/01/2006 | Perspectives on Global Imbalances -- Remarks by Raghuram Rajan, Economic Counsellor and Director of Research Department, the International Monetary Fund                                                                |
| 24/01/2006 | Remarks by IMF Managing Director Rodrigo de Rato at the Farewell Dinner for Alan Greenspan                                                                                                                              |
| 30/01/2006 | Keynote Dinner Address at the Conference on Labor and Capital Flows in Europe Following Enlargement, by Anne O. Krueger, First Deputy Managing Director, IMF                                                            |
| 30/01/2006 | A Continuous Adventure: The Pursuit Of Stability And Growth In Modern Economies, Public Lecture by Anne O. Krueger, First Deputy Managing Director, IMF                                                                 |
| 01/02/2006 | Macroeconomic Situation and External Debt in Latin America, by Anne O. Krueger, First Deputy Managing Director, IMF                                                                                                     |
| 03/02/2006 | Shared Responsibilities: Solving the Problem of Global Imbalances, Speech by Rodrigo de Rato, Managing Director, International Monetary Fund                                                                            |
| 09/02/2006 | The IMF's Medium-Term Strategy: New Priorities, New Directions, Remarks by Rodrigo de Rato, Managing Director, International Monetary Fund, at the Aspen Institute                                                      |
| 21/02/2006 | Opening Remarks by Wanda Tseng, Deputy Director, Asia and Pacific Department, IMF, in a Conference Call with Journalists on the Completion of the 2005 Article IV Review of the India Economy                           |
| 23/02/2006 | Evolution not Revolution: The Changing Role of the IMF in the Global Economy, by Anne O. Krueger, First Deputy Managing Director, IMF                                                                                   |
| 07/03/2006 | The Development of China's Export Performance, Presentation by Javier Silva-Ruete, Alternate Executive Director, IMF                                                                                                    |
| 08/03/2006 | The Ebbing Spirit of Internationalism and the International Monetary Fund: The 2006 Krasnoff Lecture -- Remarks by Raghuram Rajan, Economic Counsellor and Director of Research Department, International Monetary Fund |
| 13/03/2006 | Globalization Challenges for the IMF -- Remarks by Mr. Takatoshi Kato, Deputy Managing Director, International Monetary Fund                                                                                            |
| 15/03/2006 | Making a Blessing of Oil: Sources of Growth in the CEMAC Region, Remarks by Rodrigo de Rato, Managing Director of the International Monetary Fund                                                                       |
| 16/03/2006 | The IMF's Medium-Term Strategy for Low-Income Countries, Remarks by Rodrigo de Rato, Managing Director of the International Monetary Fund                                                                               |
| 20/03/2006 | Striving For Success: Growth, Globalization and Economic Policy Reform, by Anne O. Krueger, First Deputy Managing Director, IMF                                                                                         |
| 23/03/2006 | Petrodollar Recycling And Global Imbalances -- Presentation by Saleh M. Nsouli, Director, Offices in Europe, International Monetary Fund                                                                                |
| 23/03/2006 | The IMF's Medium-Term Strategy: Meeting the Needs of Emerging Market Members, Remarks by Rodrigo de Rato, Managing Director of the International Monetary Fund                                                          |
| 24/03/2006 | Latin America: Structural Reforms and Competitiveness, Remarks by Rodrigo de Rato, Managing Director of the International Monetary Fund                                                                                 |
| 28/03/2006 | Address to the Tripartite Review Committee Meeting of the Pacific Financial Technical Assistance Centre by Agustín Carstens, Deputy Managing Director, International Monetary Fund                                      |
| 04/04/2006 | How the IMF Can Help Promote a Collaborative Solution to Global Imbalances, Remarks by Rodrigo de Rato, Managing Director, International Monetary Fund                                                                  |
| 06/04/2006 | The World Economy at the Start of the 21st Century, Remarks by Anne O. Krueger, First Deputy Managing Director, IMF                                                                                                     |
| 09/04/2006 | Remarks by Mr. Takatoshi Kato, Deputy Managing Director, International Monetary Fund                                                                                                                                    |
| 10/04/2006 | The Role of the International Monetary Fund in a Changing World: Lecture delivered by Raghuram G. Rajan, Economic Counselor and Director of Research, IMF                                                               |
| 20/04/2006 | A Call for Cooperation: What the IMF and its Members Can Do to Solve Global Economic Problems, Speech by Rodrigo de Rato, Managing Director, International Monetary Fund                                                |
| 24/04/2006 | Address by Mr. Agustín Carstens, Deputy Managing Director, IMF                                                                                                                                                          |
| 01/05/2006 | Regional Integration in a Globalizing World: Priorities for the Caribbean, Key note speech by Agustín Carstens, Deputy Managing Director, IMF                                                                           |
| 02/05/2006 | A Remarkable Prospect: Opportunities and Challenges for the Modern Global Economy, McKenna Lecture by Anne O. Krueger, First Deputy Managing Director, IMF                                                              |
| 03/05/2006 | The New Economic Century: Experience and Opportunity in the Reform Process, by Anne O. Krueger, First Deputy Managing Director, IMF                                                                                     |
| 11/05/2006 | Globalization and International Locational Competition, Lecture by Anne O. Krueger, First Deputy Managing Director, IMF                                                                                                 |
| 12/05/2006 | A Strengthened Surveillance Role for the IMF, Remarks by Mr. Agustín Carstens, IMF Deputy Managing Director                                                                                                             |
| 17/05/2006 | The IMF in A Changing World: Keynote Address by Raghuram G. Rajan, Economic Counsellor and Director of Research, IMF                                                                                                    |

|            |                                                                                                                                                                                                                    |
|------------|--------------------------------------------------------------------------------------------------------------------------------------------------------------------------------------------------------------------|
| 19/05/2006 | The Evolving Role of the IMF And its Dialogue With Parliamentarians, Remarks by Graham Hacche, Deputy Director, External Relations Department, IMF                                                                 |
| 20/05/2006 | Is the Glass Half-Full or Half-Empty: An Outsider's Assessment of Europe's Socio-Economic Capacities, Remarks by Takatoshi Kato, Deputy Managing Director of the International Monetary Fund                       |
| 21/05/2006 | Remarks at the G8-B-MENA Meeting by Anne O Krueger, First Deputy Managing Director, International Monetary Fund                                                                                                    |
| 22/05/2006 | A Rising Tide Lifts All Boats: How Europe, by Promoting Growth, Can Help Itself and Help the World, Speech by Rodrigo de Rato, Managing Director, IMF                                                              |
| 23/05/2006 | Challenges and Opportunities for the IMF, Address by Mr. Agustín Carstens, Deputy Managing Director, International Monetary Fund                                                                                   |
| 24/05/2006 | The IMF in Asia and the World Economy, Speech by Rodrigo de Rato, Managing Director of the International Monetary Fund                                                                                             |
| 07/06/2006 | Stability, Growth, and Prosperity: The Global Economy and the IMF, Speech by Anne O. Krueger, First Deputy Managing Director, IMF                                                                                  |
| 08/06/2006 | Monetary Policy and Incentives, Address by Raghuram G. Rajan, Economic Counselor and Director of Research, IMF                                                                                                     |
| 13/06/2006 | Globalization, Flexibility and Interdependence: Equipping Economies for the 21st Century Plenary Session Keynote Address by Anne O. Krueger, First Deputy Managing Director, IMF                                   |
| 13/06/2006 | The Changing Role of the IMF in Asia and the Global Economy, Speech by Rodrigo de Rato, Managing Director of the International Monetary Fund                                                                       |
| 14/06/2006 | Meeting the Challenges of 21st Century Globalization: The IMF's Medium-Term Strategy, Speech by Rodrigo de Rato, Managing Director of the International Monetary Fund                                              |
| 15/06/2006 | The Paris Club, the IMF and Debt Sustainability, Remarks by Agustín Carstens, Deputy Managing Director, IMF                                                                                                        |
| 16/06/2006 | Adapting to the Changing Global Economy: The IMF's Medium-Term Strategy, Speech by Rodrigo de Rato, Managing Director, International Monetary Fund                                                                 |
| 23/06/2006 | The Euro-Mediterranean Partnership Ten Years On: Reassessing Readiness and Prospects, Statement by Saleh M. Nsouli, Director of IMF Offices in Europe, IMF                                                         |
| 26/06/2006 | Accelerating Development in the Mekong Region--The Role of Economic Integration, Opening Remarks by Mr. Takatoshi Kato, Deputy Managing Director, International Monetary Fund                                      |
| 29/06/2006 | Reshaping the IMF's Role in the 21st Century, Remarks by Agustín Carstens, Deputy Managing Director, IMF                                                                                                           |
| 10/07/2006 | Crisis Prevention and the IMF, Remarks by Mr. Takatoshi Kato, Deputy Managing Director, IMF                                                                                                                        |
| 13/07/2006 | Adapting to New Global Realities, Remarks by Mr. Takatoshi Kato, Deputy Managing Director                                                                                                                          |
| 31/07/2006 | Renewing the IMF's Commitment to Low-Income Countries, Speech by Rodrigo de Rato, Managing Director of the International Monetary Fund                                                                             |
| 03/08/2006 | Progress in Implementing the Fund's Medium-Term Strategy, Speech by Rodrigo de Rato, Managing Director of the International Monetary Fund                                                                          |
| 25/08/2006 | Foreign Capital and Economic Growth: Presentation by Raghuram Rajan, Economic Counsellor and Director of the Research Department, based on a paper written by Eswar Prasad, Raghuram Rajan, and Arvind Subramanian |
| 31/08/2006 | Farewell Remarks to the IMF Executive Board by Anne O Krueger, First Deputy Managing Director                                                                                                                      |
| 31/08/2006 | Opening Remarks by Rodrigo de Rato, Managing Director, at a Press Briefing for Asia and Pacific Press                                                                                                              |
| 05/09/2006 | Key Steps in IMF Reform: Taking Stock on the Eve of the Annual Meetings in Singapore, Speech by Rodrigo de Rato, Managing Director of the IMF                                                                      |
| 07/09/2006 | Economic Policies and Global Prosperity: Challenges for Asia and the IMF, Address by John Lipsky, First Deputy Managing Director, IMF                                                                              |
| 08/09/2006 | Meeting the Challenges of 21st Century Globalization: The Medium-Term Strategy of the IMF, Speech by Rodrigo de Rato, Managing Director, IMF                                                                       |
| 12/09/2006 | Remarks by John Lipsky, First Deputy Managing Director, IMF                                                                                                                                                        |
| 12/09/2006 | Prospects for the World Economy - Address by Rodrigo de Rato, Managing Director, IMF                                                                                                                               |
| 13/09/2006 | The Reform Process at the International Monetary Fund, Address by John Lipsky, First Deputy Managing Director, IMF                                                                                                 |
| 16/09/2006 | Opening Remarks by Anoop Singh, Director, IMF Western Hemisphere Department, at a Press Briefing on the Regional Economic Outlook for Latin America and the Caribbean                                              |
| 18/09/2006 | Statement On the Occasion of the General Assembly Meeting on Least Developed Countries by Rodrigo de Rato Managing Director of the IMF                                                                             |
| 18/09/2006 | Strengthening IMF Surveillance: What Have We Learned from Independent Evaluations? Remarks by Agustín Carstens, Deputy Managing Director, IMF                                                                      |
| 18/09/2006 | Remarks at Bretton Woods Committee Annual International Council Meeting by Agustín Carstens, Deputy Managing Director, IMF                                                                                         |
| 19/09/2006 | An Enduring Need: The Importance of Multilateralism in the 21st Century, Remarks by Anne O. Krueger                                                                                                                |
| 19/09/2006 | Remarks by Rodrigo de Rato, Chairman of the Executive Board and Managing Director of the International Monetary Fund, to the Board of Governors of the IMF at the Joint Annual Discussion                          |
| 20/09/2006 | Closing remarks by Rodrigo de Rato, Managing Director of the International Monetary Fund, at the Joint Annual Discussion                                                                                           |
| 29/09/2006 | Financial Markets and Economic Growth, by Anne O. Krueger, Special Advisor to the Managing Director                                                                                                                |
| 04/10/2006 | Opportunities and Challenges for Banks and Supervisors in an Internationalized Financial System, Remarks by Agustín Carstens, Deputy Managing Director, IMF                                                        |
| 06/10/2006 | Benign Financial Conditions, Asset Management, and Political Risks: Trying to Make Sense of Our Times, Luncheon Address by Raghuram G. Rajan, Economic Counselor and Director of Research, IMF                     |
| 17/10/2006 | Lessons Learned on Oil Revenue Management, Remarks by Takatoshi Kato, Deputy Managing Director, IMF                                                                                                                |
| 18/10/2006 | Modernizing the IMF for the 21st Century, Remarks by Masood Ahmed, Director, External Relations Department, IMF                                                                                                    |
| 07/11/2006 | Opening Remarks on Deepening the Financial Sector in Africa by John Lipsky, First Deputy Managing Director, IMF                                                                                                    |
| 10/11/2006 | Opening Remarks for Seminar on Scaling Up Aid and Promoting Growth in The West African Economic and Monetary Union (WAEMU), by John Lipsky, First Deputy Managing Director, IMF                                    |

|            |                                                                                                                                                                                                                             |
|------------|-----------------------------------------------------------------------------------------------------------------------------------------------------------------------------------------------------------------------------|
| 16/11/2006 | Investment Restraint, The Liquidity Glut, and Global Imbalances: Remarks by Raghuram G. Rajan, Economic Counselor and Director of Research                                                                                  |
| 18/11/2006 | Energy Policy in the Global Economy -- Speech by Rodrigo de Rato, Managing Director, IMF                                                                                                                                    |
| 21/11/2006 | How Europe can Help the Global Economy while Helping Itself, Speech by Rodrigo de Rato, Managing Director of the International Monetary Fund                                                                                |
| 23/11/2006 | The Growing Integration of the Financial Sector and the Broader Economy: Challenges for Policy Makers, Speech by Rodrigo de Rato, Managing Director of the International Monetary Fund                                      |
| 30/11/2006 | Latin America: Between Populism and Modernity -- Speech by Rodrigo de Rato, Managing Director, IMF                                                                                                                          |
| 01/12/2006 | Is There a Global Shortage of Fixed Assets?, Remarks by Raghuram G. Rajan, Economic Counselor and Director of Research                                                                                                      |
| 19/12/2006 | Opening Remarks by Takatoshi Kato, Deputy Managing Director, International Monetary Fund, At the High-Level Seminar on: Institutions and Economic Growth in the Arab Countries                                              |
| 19/12/2006 | Enhancing Macroeconomic Policies Through Communications, Welcoming Remarks by Takatoshi Kato, Deputy Managing Director, IMF                                                                                                 |
| 20/12/2006 | Introductory Remarks by Rodrigo de Rato Managing Director of the International Monetary Fund, At the Conference on Financial Sector Reforms and Prospects for Financial Integration in the Maghreb Countries                |
| 09/01/2007 | The Benefits of Partnership: Keynote Speech for the Inauguration of the Central AFRITAC Speech by Rodrigo de Rato, Managing Director of the International Monetary Fund, at the Inauguration of the Central AFRITAC         |
| 17/01/2007 | Meeting Global Economic Challenges: How Europe can Support a Multilateral Approach, Speech by Rodrigo de Rato, Managing Director of the International Monetary Fund                                                         |
| 22/01/2007 | Ten Years After the Asian Currency Crisis: Future Challenges for the Asian Economies and Financial Markets, Speech by Rodrigo de Rato, Managing Director of the International Monetary Fund                                 |
| 24/01/2007 | Remarks by John Lipsky, First Deputy Managing Director, IMF, at Joint India-IMF Training Program, in Pune, India                                                                                                            |
| 02/02/2007 | Developing Deeper Capital Markets in Emerging Market Economies, Remarks by John Lipsky First Deputy Managing Director, IMF, at the U.S. Department of the Treasury                                                          |
| 02/02/2007 | Speech at the High-Level Conference on Investment in Central America, by Rodrigo de Rato, Managing Director of the IMF, San Jose, Costa Rica                                                                                |
| 05/02/2007 | Globalization by the Book, Keynote Address Given at the American Association of Publishers, by Prakash Loungani, Chief, Policy Communications, External Relations Department, International Monetary Fund                   |
| 08/02/2007 | Remarks by IMF Deputy Managing Director Murilo Portugal, At a Debt Managers Conference, Cairo                                                                                                                               |
| 13/02/2007 | Remarks by Rodrigo de Rato, Managing Director of the International Monetary Fund, at the Liberia Partners' Forum                                                                                                            |
| 15/02/2007 | Opening Remarks by Jaime Caruana, Counsellor and Director, Monetary and Capital Markets Department, IMF - At the Ageing, Pension Risk Management and Financial Stability Seminar                                            |
| 16/02/2007 | The Way Forward for Reform in Latin America, Speech by Rodrigo de Rato, Managing Director of the International Monetary Fund, at the Latin American Business Association Conference                                         |
| 26/02/2007 | Speech by Rodrigo de Rato, Managing Director of the IMF, the Harvard Business School Alumni Dinner                                                                                                                          |
| 01/03/2007 | Remarks by Rodrigo de Rato, Managing Director of the International Monetary Fund, At the Intergovernmental Conference on Middle Income Countries                                                                            |
| 02/03/2007 | Challenges and Opportunities for the Financial Sector and for Savings Banks, speech by Rodrigo de Rato, Managing Director of the International Monetary Fund at the Meeting of the Spanish Confederation of Savings Banks   |
| 13/03/2007 | IMF Reform and Exchange Rate Surveillance, Keynote Speech by Takatoshi Kato, Deputy Managing Director of the International Monetary Fund at the IMF Conference on Exchange Rate Analysis: Its Present and Future, Singapore |
| 17/03/2007 | When More Is Not Enough: Delivering Better Aid, Remarks by Mr. Bio-Tchané, African Department Director, at the Annual Conference of the Parliamentary Network on the World Bank, Cape Town, South Africa                    |
| 22/03/2007 | Meeting on the International Compact with Iraq, Statement by Takatoshi Kato, Deputy Managing Director of the International Monetary Fund, United Nations Headquarters                                                       |
| 23/03/2007 | Responding to Shifts in Financial Risk: the Need for Leadership, Speech by Rodrigo de Rato, Managing Director of the International Monetary Fund, at the Wharton School, University of Pennsylvania                         |
| 30/03/2007 | Sustaining Global Growth, Address by Rodrigo de Rato, Managing Director of the International Monetary Fund at First Economic Forum of Comunidad de Madrid                                                                   |
| 30/03/2007 | Remarks by Rodrigo de Rato, Managing Director of the International Monetary Fund, on his Acceptance of the Club Financiero Génova Award                                                                                     |
| 02/04/2007 | Reducing the Risk from Global Imbalances, Remarks by John Lipsky, First Deputy Managing Director, International Monetary Fund, at the Ambrosetti 18th Annual Forum The Outlook for Financial Markets, Cernobbio, Italy      |
| 04/04/2007 | Remarks by Murilo Portugal, Deputy Managing Director of the International Monetary Fund, At a High-level Regional Seminar on Inflation Targeting in Rabat, Morocco                                                          |
| 06/04/2007 | Understanding China, Remarks by John Lipsky, First Deputy Managing Director, IMF, At the Conference on Global Implications of China's Trade, Investment and Growth, Washington                                              |
| 09/04/2007 | Speech by Rodrigo de Rato, Managing Director of the International Monetary Fund, at the Peterson Institute for International Economics                                                                                      |
| 13/04/2007 | Improving the Outlook for Latin America and the Caribbean, Remarks by John Lipsky, First Deputy Managing Director, IMF                                                                                                      |
| 14/04/2007 | Opening Remarks by Michael Deppler, Director, European Department, International Monetary Fund, at a Press Briefing on Economic Outlook and Issues in Europe                                                                |
| 27/04/2007 | Speech by Rodrigo de Rato, Managing Director of the IMF at the MIT Latin Conference                                                                                                                                         |
| 02/05/2007 | Speech by Rodrigo de Rato, Managing Director of the International Monetary Fund at the 37th Washington Conference of the Council of the Americas                                                                            |
| 03/05/2007 | International Compact with Iraq, Statement by Mr. Takatoshi Kato, Deputy Managing Director of the International Monetary Fund, Sharm el-Sheikh, Egypt, May 3, 2007                                                          |
| 05/05/2007 | Speaking Notes At the 40th ADB Annual Meetings, Seminar on A Borderless Asia: Vision for Regional Integration by Mr. Takatoshi Kato, Deputy Managing Director of the IMF                                                    |
| 07/05/2007 | Identifying Risks and Opportunities: A Global View, Speech by Jaime Caruana, Monetary and Capital Markets Department Director, IMF                                                                                          |
| 10/05/2007 | Learning from Experience: Debt Defaults and Lessons from a Decade of Crises, Remarks by John Lipsky, First Deputy Managing Director, IMF                                                                                    |

|            |                                                                                                                                                                                                                                                                             |
|------------|-----------------------------------------------------------------------------------------------------------------------------------------------------------------------------------------------------------------------------------------------------------------------------|
| 14/05/2007 | Latin America: Building on Recent Trends and Sustaining Rising Prosperity, Anoop Singh, Director, Western Hemisphere Department, IMF                                                                                                                                        |
| 14/05/2007 | Positioning the Fund to Meet Global Challenges, Statement by Rodrigo de Rato, Managing Director of the IMF                                                                                                                                                                  |
| 16/05/2007 | Asia and the IMF: 10 Years After the Asian Crisis, Speech by David Burton, Director of the Asia & Pacific Department, IMF                                                                                                                                                   |
| 17/05/2007 | Perspectives and Lessons from Country Experiences with Inflation Targeting, Remarks at a Panel on Inflation Targeting, by Mr. Murilo Portugal, Deputy Managing Director, IMF                                                                                                |
| 23/05/2007 | Honing Europe's Competitive Edge, Remarks by Murilo Portugal, Deputy Managing Director, IMF                                                                                                                                                                                 |
| 30/05/2007 | Global Financial Market Risk-Who is Responsible for What? Keynote Address by Jaime Caruana, Director, Monetary and Capital Markets Department, IMF                                                                                                                          |
| 31/05/2007 | The Multilateral Approach to Global Imbalances, Remarks by John Lipsky at the Brussels Economic Forum 2007, May 31, 2007                                                                                                                                                    |
| 04/06/2007 | Hungary's Economic Achievements and Prospects, Speech by John Lipsky, First Deputy Managing Director of the IMF, At Hungary's Social and Economic Council                                                                                                                   |
| 05/06/2007 | Asia: Ten Years On--Taking Stock and Looking Forward, Speech by David Burton, Director, Asia and Pacific Department, IMF, Singapore Press Club, Singapore                                                                                                                   |
| 12/06/2007 | Steering a Course Through the Torrent of Change: Principles for Reform of the International Monetary Fund, Speech by Rodrigo de Rato, Managing Director of the International Monetary Fund, to the Bretton Woods Committee, Washington, D.C.                                |
| 18/06/2007 | Keeping the Train on the Rails: How Countries in the Americas and Around the World Can Meet the Challenges of Globalization, by Rodrigo de Rato, Managing Director of the IMF                                                                                               |
| 19/06/2007 | Regional Integration in the Caribbean, Remarks by Mr. Takatoshi Kato, Deputy Managing Director, International Monetary Fund                                                                                                                                                 |
| 19/06/2007 | Scanning the Horizon: Monitoring and Managing Financial Market Risks, Speech by Rodrigo de Rato, Managing Director of the IMF, at the Economic Club of Toronto                                                                                                              |
| 20/06/2007 | International Financial Markets -- Stability and Transparency in the 21st Century, Keynote speech by John Lipsky, First Deputy Managing Director, International Monetary Fund                                                                                               |
| 28/06/2007 | Taking Advantage of the Benign Global Environment: A Time for Reforms Remarks by IMF Deputy Managing Director Murilo Portugal at the Sixth Annual Regional Conference on Central America, Panama, and the Dominican Republic                                                |
| 29/06/2007 | What is the IMF doing to help countries maximize the benefits of globalization?                                                                                                                                                                                             |
| 05/07/2007 | Long-Term Fiscal Sustainability: Recent Advances and Future Challenges, Opening Address by Murilo Portugal, Deputy Managing Director, IMF                                                                                                                                   |
| 11/07/2007 | The Global Outlook and the Evolving Role of the Fund: Speech by John Lipsky, First Deputy Managing Director, International Monetary Fund                                                                                                                                    |
| 19/07/2007 | Confronting the Future with Wisdom and Courage, Speech by Rodrigo de Rato, Managing Director of the International Monetary Fund                                                                                                                                             |
| 28/07/2007 | Capital Flows in an Interconnected World, Speech by Rodrigo de Rato, Managing Director of the International Monetary Fund                                                                                                                                                   |
| 30/07/2007 | Reaping the Benefits of Globalization: Economic Prospects and Challenges for Asia                                                                                                                                                                                           |
| 31/07/2007 | The Global Economy and Financial Markets: Where Next?, Speech by John Lipsky, First Deputy Managing Director, International Monetary Fund                                                                                                                                   |
| 22/08/2007 | Economic Growth and Financial Market Development: A Strengthening Integration, Speech by Rodrigo de Rato, Managing Director of the International Monetary Fund                                                                                                              |
| 07/09/2007 | The Implications of Recent Financial Market Turbulence for the Global Economy, Speech by Rodrigo de Rato, Managing Director of the International Monetary Fund                                                                                                              |
| 17/09/2007 | The Global Outlook: Implications for Latin America and the Caribbean                                                                                                                                                                                                        |
| 20/09/2007 | Macroeconomic Policies and Social Equity, Speech by Rodrigo de Rato, Managing Director of the International Monetary Fund at the Opening Session of the ECLAC-IMF Conference, Lima, Peru                                                                                    |
| 20/09/2007 | Macroeconomics and Equity, Speech by Rodrigo de Rato, Managing Director of the IMF                                                                                                                                                                                          |
| 24/09/2007 | The Role of the Fund in Low-Income Countries, Speech by John Lipsky, First Deputy Managing Director of the IMF, at Oxfam event                                                                                                                                              |
| 24/09/2007 | The Tensions of Growth: Economic Perspectives and Key Factors for Human Development, Speech by Rodrigo de Rato, Managing Director of the IMF, at the Club of Rome, Madrid, Spain                                                                                            |
| 27/09/2007 | Through the Looking Glass: The Links Between Financial Globalization and Systemic Risk, Speech by John Lipsky, First Deputy Managing Director of the International Monetary Fund                                                                                            |
| 05/10/2007 | Challenges to the International Monetary System: Rebalancing Currencies, Institutions, and Rates                                                                                                                                                                            |
| 05/10/2007 | Comments on CGD Report on IMF Programs and Health Spending by Abdoulaye Bio-Tchané, Director, African Department, IMF                                                                                                                                                       |
| 08/10/2007 | Speech by Rodrigo de Rato, Managing Director of the IMF, at the Ibero-American Association of Chambers of Commerce, Madrid, Spain                                                                                                                                           |
| 19/10/2007 | Comments by Steven Dunaway, Deputy Director, Asia and Pacific Department of the International Monetary Fund, on a paper: IMF Surveillance Over China's Exchange Rate by Michael Mussa, at the Peterson Institute Conference on China's Exchange Rate Policy                 |
| 22/10/2007 | Closing Remarks by Rodrigo de Rato, Managing Director of the International Monetary Fund, at the Joint Annual Discussion                                                                                                                                                    |
| 22/10/2007 | Remarks by Rodrigo de Rato, Chairman of the Executive Board and Managing Director of the International Monetary Fund, to the Board of Governors of the IMF at the Joint Annual Discussion, 2007 Annual Meetings of the International Monetary Fund and the World Bank Group |
| 23/10/2007 | Aid Commitments and the MDGs - Address by Mr. Murilo Portugal, Deputy Managing Director, International Monetary Fund                                                                                                                                                        |
| 25/10/2007 | The World after the Crisis in the Credit Markets: Economic Outlook and Challenges - Speech by Rodrigo de Rato, Managing Director of the International Monetary Fund                                                                                                         |
| 16/11/2007 | Speaking Notes for Dominique Strauss-Kahn, Managing Director of the IMF, at the Eighth Jacques Polak Annual Research Conference                                                                                                                                             |
| 19/11/2007 | Financial Market Turbulence and Global Imbalances, Remarks at Conference on European Economic Integration, Austrian National Bank, by John Lipsky, First Deputy Managing Director, IMF                                                                                      |
| 28/11/2007 | Introductory Remarks At the Conference on the Role of the Private Sector in Economic Development and Regional Integration in the Maghreb, By Murilo Portugal, Deputy Managing Director, IMF                                                                                 |

|            |                                                                                                                                                                                                                                                                                                                                  |
|------------|----------------------------------------------------------------------------------------------------------------------------------------------------------------------------------------------------------------------------------------------------------------------------------------------------------------------------------|
| 11/12/2007 | Remarks by Jaime Caruana, Councillor and Director of IMF's Monetary and Capital Markets Department at Institute of International Bankers' Seminar on Basel II                                                                                                                                                                    |
| 11/12/2007 | Fiscal Policy Instruments and Climate Change, Presentation by Takatoshi Kato, Deputy Managing Director of the International Monetary Fund at Finance Ministers Meeting in Bali, Indonesia                                                                                                                                        |
| 12/12/2007 | Challenges and Opportunities from Financial Globalization for Fund Managers and Policy Makers in the Asia-Pacific Region, Remarks by Takatoshi Kato, Deputy Managing Director, IMF                                                                                                                                               |
| 14/12/2007 | Statement by Takatoshi Kato, Deputy Managing Director of the International Monetary Fund at High-Level Segment of the Thirteenth Conference of the Parties to the UN Framework Convention on Climate Change                                                                                                                      |
| 03/03/2010 | Recovering from the Global Crisis: Exit Policies and Challenges Ahead, by Murilo Portugal, IMF Deputy Managing Director, at the Australian School of Business                                                                                                                                                                    |
| 08/03/2010 | Africa's Economic Transformation—the Road Ahead, Address by Dominique Strauss-Kahn, Managing Director, IMF                                                                                                                                                                                                                       |
| 17/03/2010 | International Policy Cooperation: Essential for Securing the Global Economic Recovery and Modernizing the Global Financial Architecture, Address by Dominique Strauss-Kahn, Managing Director, IMF                                                                                                                               |
| 19/03/2010 | Crisis Management Arrangements for a European Banking System, Speech by Managing Director Dominique Strauss-Kahn at the European Commission conference - Building a Crisis Management Framework for the Single Market                                                                                                            |
| 21/03/2010 | Fiscal Policy Challenges in the Post-Crisis World, Speech by John Lipsky, First Deputy Managing Director, At the China Development Forum                                                                                                                                                                                         |
| 22/03/2010 | Realizing the Potential of Asia's Developing Economies, By John Lipsky, First Deputy Managing Director, International Monetary Fund                                                                                                                                                                                              |
| 28/03/2010 | After the Global Financial Crisis—The Road Ahead for Europe, a Speech by the Managing Director Dominique Strauss-Kahn                                                                                                                                                                                                            |
| 10/04/2010 | Economic Policy Challenges in the Post-Crisis Period, a Speech by the Managing Director Dominique Strauss-Kahn                                                                                                                                                                                                                   |
| 23/04/2010 | Opening Remarks at the High-Level Meeting on "The Emerging Framework for Financial Regulation and Monetary Policy" by John Lipsky, First Deputy Managing Director, IMF                                                                                                                                                           |
| 26/04/2010 | Speech by IMF's Deputy Managing Director Shinohara for the 14th ASEAN Finance Ministers' Meeting                                                                                                                                                                                                                                 |
| 26/04/2010 | Presentation by IMF's Deputy Managing Director Shinohara for the ASEAN Central Bank Governors' Meeting                                                                                                                                                                                                                           |
| 02/05/2010 | Reform of the Global Monetary System, ADB Seminar Series, Naoyuki Shinohara, Deputy Managing Director, International Monetary Fund                                                                                                                                                                                               |
| 11/05/2010 | Concluding Remarks by Dominique Strauss-Kahn, Managing Director of the International Monetary Fund, at the High-Level Conference on the International Monetary System                                                                                                                                                            |
| 19/05/2010 | Systemic Challenges for Global Finance and Priorities for Reform, Remarks by John Lipsky, First Deputy Managing Director, IMF, delivered at the seminar, Reshaping the Global Financial Landscape: Implications for Asia                                                                                                         |
| 27/05/2010 | Lessons from the Crisis for Central Banks, Speech by José Viñals Financial Counsellor and Director, Monetary and Capital Markets Department, IMF, delivered at the Bundesbank Spring Conference                                                                                                                                  |
| 28/05/2010 | Regulatory Reform in Difficult Times – A Tough Balancing Act, address by José Viñals, Financial Counsellor and Director, IMF Monetary and Capital Markets Department                                                                                                                                                             |
| 28/05/2010 | Address to Finance Ministers of the Americas and Caribbean, By Dominique Strauss-Kahn, Managing Director, International Monetary Fund                                                                                                                                                                                            |
| 03/06/2010 | The Role of the Fund in Reshaping the Financial Sector Landscape, A Keynote Remarks by Min Zhu, Special Advisor to the Managing Director International Monetary Fund delivered at the Tenth Annual International Seminar on Policy Challenges for the Financial Sector Towards a Brave New World: Reshaping Financial Regulation |
| 09/06/2010 | Presentation by IMF's Deputy Managing Director Shinohara at the Public Lecture hosted jointly by the Lee Kuan Yew School of Public Policy & Monetary Authority of Singapore                                                                                                                                                      |
| 18/06/2010 | The Road Ahead for Central Banks: Meeting New Challenges to Financial Stability, Speech by John Lipsky, IMF First Deputy Managing Director                                                                                                                                                                                       |
| 29/06/2010 | Crisis and Beyond-the Next Phase of IMF Reform, By Dominique Strauss-Kahn, Managing Director, International Monetary Fund                                                                                                                                                                                                        |
| 30/06/2010 | Liberia: Life after Debt, Speech by John Lipsky, IMF First Deputy Managing Director                                                                                                                                                                                                                                              |
| 02/07/2010 | Living in a New World of Heightened Sovereign Risks, Opening Remarks by Murilo Portugal, Deputy Managing Director, IMF, at the 10th IMF Forum on Policy and Operational Issues Facing Public Debt Management, Managing Sovereign Balance Sheet Risks in Turbulent Times                                                          |
| 09/07/2010 | Towards an International Framework for Cross Border Resolution, Remarks by John Lipsky, First Deputy Managing Director, International Monetary Fund, at the ECB and its Watchers Conference XII                                                                                                                                  |
| 12/07/2010 | Asia and the Global Economy: Leading the Way Forward in the 21st Century, Opening Remarks by Dominique Strauss-Kahn, Managing Director of the IMF, at the Asia 21 Conference - Daejeon, Korea – July 12, 2010                                                                                                                    |
| 27/07/2010 | The G-20 Agenda: Looking to Seoul, Remarks by John Lipsky, First Deputy Managing Director, International Monetary Fund                                                                                                                                                                                                           |
| 27/07/2010 | Transforming Asia's Low-Income Countries into Tomorrow's Emerging Markets, Speech by Min Zhu, Special Advisor to the Managing Director, International Monetary Fund, Daejeon, South Korea                                                                                                                                        |
| 28/08/2010 | Reconsidering the International Monetary System, Panel Presentation by John Lipsky, First Deputy Managing Director, International Monetary Fund, At the Federal Reserve Bank of Kansas City's Economic Policy Symposium "Macroeconomic Challenges: The Decade Ahead"                                                             |
| 13/09/2010 | The Challenges of Growth, Employment, and Social Cohesion—Opening Remarks                                                                                                                                                                                                                                                        |
| 14/09/2010 | Towards a New Fiscal Framework for the Euro Area, Address by Dominique Strauss-Kahn at the Bruegel-IMF Conference                                                                                                                                                                                                                |
| 15/09/2010 | Prospects for International Economic Cooperation, Remarks by John Lipsky, First Deputy Managing Director, IMF                                                                                                                                                                                                                    |
| 16/09/2010 | Reaching the Millennium Development Goals—Macroeconomic Prospects and Challenges in Low-Income Countries, Opening Remarks by John Lipsky, First Deputy Managing Director, International Monetary Fund                                                                                                                            |
| 20/09/2010 | Address to Opening Plenary of United Nations Summit on Millennium Development Goals, By Dominique Strauss-Kahn, Managing Director, International Monetary Fund                                                                                                                                                                   |
| 23/09/2010 | Macro-prudential Regulatory Policies: The New Road to Financial Stability? Welcoming Remarks by José Viñals, Director, Monetary and Capital Markets Department, International Monetary Fund, at IMF/Federal Reserve Bank of Chicago International Banking Conference                                                             |
| 23/09/2010 | Opening Remarks by Murilo Portugal, Deputy Managing Director, International Monetary Fund, at a Seminar on Financial Sector Taxation, Paris                                                                                                                                                                                      |
| 28/09/2010 | Remarks by Naoyuki Shinohara, Deputy Managing Director, IMF, at Panel Discussion on Global Financial and Economic Governance, World Capital Markets Symposium, Kuala Lumpur                                                                                                                                                      |

|            |                                                                                                                                                                                                                                                  |
|------------|--------------------------------------------------------------------------------------------------------------------------------------------------------------------------------------------------------------------------------------------------|
| 28/09/2010 | Taking Stock of Financial Sector Reform, Remarks by John Lipsky, First Deputy Managing Director, International Monetary Fund, Delivered at Depository Trust and Clearance Corporation Executive Forum                                            |
| 08/10/2010 | Opening Address to the 2010 Annual Meetings of the Boards of Governors of the World Bank Group and the International Monetary Fund, by Dominique Strauss-Kahn, Managing Director, International Monetary Fund                                    |
| 10/10/2010 | Navigating the New Normal in Industrial Countries Per Jacobsson Foundation Lecture                                                                                                                                                               |
| 18/10/2010 | Macro-Prudential Policies -- an Asian Perspective, Closing Remarks by Dominique Strauss-Kahn, Managing Director, International Monetary Fund                                                                                                     |
| 19/10/2010 | Closing Remarks at the IMF-World Bank Celebrations of World Statistics Day, By Ms. Adelheid Burgi-Schmelz, Director, Statistics Department, IMF                                                                                                  |
| 19/10/2010 | Opening Remarks at the IMF-World Bank Celebrations of World Statistics Day, By Murilo Portugal, Deputy Managing Director, IMF                                                                                                                    |
| 20/10/2010 | The Financial Crisis and Information Gaps, Speech by Murilo Portugal, Deputy Managing Director, IMF                                                                                                                                              |
| 01/11/2010 | Human Development and Wealth Distribution, By Dominique Strauss-Kahn, Managing Director, International Monetary Fund                                                                                                                             |
| 04/11/2010 | Natural Resources, Finance, and Development: Confronting Old and New Challenges                                                                                                                                                                  |
| 06/11/2010 | Economic Outlook and Policy Challenges, APEC Finance Minister's Meeting, Presentation by Naoyuki Shinohara, Deputy Managing Director, International Monetary Fund                                                                                |
| 10/11/2010 | Towards a Safer Global Financial System, Speech by José Viñals, Financial Counsellor and Director of Monetary and Capital Markets Department, IMF                                                                                                |
| 19/11/2010 | Europe's Growth Challenges, By Dominique Strauss-Kahn, Managing Director, International Monetary Fund, Frankfurt, November 19, 2010                                                                                                              |
| 23/11/2010 | Informal ASEAN+3 Finance and Central Bank Deputies Meeting, Presentation by Naoyuki Shinohara, Deputy Managing Director, International Monetary Fund                                                                                             |
| 23/11/2010 | The Post-Summit Prospects for Policy Cooperation, Remarks by John Lipsky, First Deputy Managing Director, International Monetary Fund, Delivered at the Economic Club of New York                                                                |
| 02/12/2010 | India and the Global Recovery: Key Policy Challenges, Speech by Dominique Strauss-Kahn, Managing Director, International Monetary Fund, delivered at Federation of Indian Chambers of Commerce and Industry (FICCI)                              |
| 06/12/2010 | Address to European Development Days, Speech by Dominique Strauss-Kahn, Managing Director, IMF                                                                                                                                                   |
| 08/12/2010 | The Triple Comeback -- the Impact of the Financial Crisis on Global Economic Governance, Speech by By Dominique Strauss-Kahn, Managing Director, International Monetary Fund                                                                     |
| 08/01/2011 | US Fiscal Policy and the Global Outlook, Speech by John Lipsky, First Deputy Managing Director, IMF, at the American Economic Association Annual Meetings, Roundtable on "The United States in the World Economy", Denver                        |
| 11/01/2011 | "Tax Policy and Tax Administration Challenges for Restoring Fiscal Sustainability" IMF-Japan High level Tax Seminar for Asian and Pacific Countries, Opening Remarks by Naoyuki Shinohara, Deputy Managing Director, International Monetary Fund |
| 24/01/2011 | Third IMF Roundtable of Sovereign Asset and Reserve Managers Financial Crisis and Reserve Management: Outlook for the Future                                                                                                                     |
| 24/01/2011 | Latin America in an Uneven Global Recovery: Managing Abundance                                                                                                                                                                                   |
| 01/02/2011 | The Right Kind of Global Recovery                                                                                                                                                                                                                |
| 07/02/2011 | Public Lecture on Global and Regional Economic Prospects by Naoyuki Shinohara, IMF's Deputy Managing Director                                                                                                                                    |
| 09/02/2011 | "IMF/JSA Regional Conference on Banking Supervision and Regulation" Opening Address by Naoyuki Shinohara, Deputy Managing Director, International Monetary Fund                                                                                  |
| 10/02/2011 | Toward a More Stable International Monetary System, Opening Remarks by Dominique Strauss-Kahn, Managing Director, IMF                                                                                                                            |
| 25/02/2011 | Keynote Address at the 46th SEACEN Governors Conference by Mr. Naoyuki Shinohara, Deputy Managing Director                                                                                                                                       |
| 07/03/2011 | Lunchtime Speech: Assessing the Agenda for Economic Policy Cooperation John Lipsky, First Deputy Managing Director, International Monetary Fund, IMF Conference on Macro and Growth Policies in the Wake of the Crisis                           |
| 07/03/2011 | "Macro and Growth Policies in the Wake of the Crisis" Opening Remarks by Dominique Strauss-Kahn, Managing Director, International Monetary Fund at the IMF Conference on Macro and Growth Policies in the Wake of the Crisis                     |
| 18/03/2011 | Financial Crisis and Sovereign Risk: Implications for Financial Stability IMF High-Level Roundtable Opening Remarks By Dominique Strauss-Kahn, Managing Director, International Monetary Fund                                                    |
| 20/03/2011 | Fiscal Policy and Structural Fiscal Challenges, remarks by John Lipsky at the China Development Forum                                                                                                                                            |
| 30/03/2011 | Welcome Remarks by Adelheid Burgi-Schmelz, Director IMF Statistics Department, At the Conference on Implementing the G-20 Data Gaps Recommendations: State of Play and Next Steps                                                                |
| 30/03/2011 | Natural Resources and Development: Confronting Emerging Challenges in Botswana, Public Lecture at the Bank of Botswana By Mr. Naoyuki Shinohara, Deputy Managing Director, International Monetary Fund                                           |
| 31/03/2011 | High-Level Seminar on the International Monetary System, Keynote address by Dominique Strauss-Kahn, Managing Director, International Monetary Fund                                                                                               |
| 04/04/2011 | "Global Challenges, Global Solutions" -- an Address at George Washington University By Dominique Strauss-Kahn, Managing Director, International Monetary Fund                                                                                    |
| 07/04/2011 | Presentation to the Central Bank Governors of ASEAN, Asean+3 Meetings by Naoyuki Shinohara, IMF Deputy Managing Director                                                                                                                         |
| 13/04/2011 | The Global Jobs Crisis— Sustaining the Recovery through Employment and Equitable Growth, By Dominique Strauss-Kahn, Managing Director, International Monetary Fund                                                                               |
| 02/05/2011 | The Global Economic Situation and Its Impact on the Transatlantic Relationship by John Lipsky, First Deputy Managing Director, International Monetary Fund                                                                                       |
| 02/05/2011 | The Do's and Don'ts of Macroprudential Policy, by José Viñals, IMF Financial Counsellor and Director, Monetary and Capital Markets Department                                                                                                    |
| 06/05/2011 | "Joint IMF/ADB Seminar on Nurturing New Engines of Growth" Remarks by Naoyuki Shinohara, Deputy Managing Director, International Monetary Fund                                                                                                   |
| 13/05/2011 | China: Economic Transformation and Financial Reform; Speech by John Lipsky, First Deputy Managing Director, International Monetary Fund                                                                                                          |
| 19/05/2011 | "Summoning the Will to Act" by John Lipsky—Acting Managing Director, International Monetary Fund, Annual Meeting of the Bretton Woods Committee                                                                                                  |
| 25/05/2011 | Managing Capital Flows in Emerging Markets                                                                                                                                                                                                       |

|            |                                                                                                                                                                                                                                                                            |
|------------|----------------------------------------------------------------------------------------------------------------------------------------------------------------------------------------------------------------------------------------------------------------------------|
| 02/06/2011 | Seeing Both the Forest and the Trees- Supervising Systemic Risk by José Viñals, IMF Financial Counsellor and Director, Monetary and Capital Markets Department, Opening Remarks at the Eleventh Annual International Seminar on Policy Challenges for the Financial Sector |
| 07/06/2011 | Achieving Sustainable Economic Reforms in Greece in 2011 and Beyond                                                                                                                                                                                                        |
| 09/06/2011 | Opening Remarks by Mr. John Lipsky – Acting Managing Director, International Monetary Fund, Press Conference at the Conclusion of the Article IV Mission to China                                                                                                          |
| 20/06/2011 | Opening Remarks by Mr. John Lipsky, Acting Managing Director, IMF Press Conference at the Conclusion of the Euro Area Article IV Mission 2011                                                                                                                              |
| 21/06/2011 | FAD/EUO Joint Conference on Public Health Care Reforms: Challenges and Lessons for Advanced and Emerging Europe, Keynote Address by Mr. Naoyuki Shinohara, Deputy Managing Director, IMF                                                                                   |
| 21/06/2011 | "The Challenges of Economic Policy Cooperation" By John Lipsky – Acting Managing Director, International Monetary Fund                                                                                                                                                     |
| 26/07/2011 | "Challenges and Opportunities for the World Economy and the IMF", Christine Lagarde, Managing Director, International Monetary Fund                                                                                                                                        |
| 28/07/2011 | Opening Remarks by IMF Deputy Managing Director Nemat Shafik                                                                                                                                                                                                               |
| 27/08/2011 | "Global Risks Are Rising, But There Is a Path to Recovery": Remarks at Jackson Hole, By Christine Lagarde, Managing Director, International Monetary Fund                                                                                                                  |
| 09/09/2011 | "The Challenges for the Global Economy", Opening Remarks by Christine Lagarde, Managing Director, International Monetary Fund at the Royal Institute for International Affairs - Chatham House                                                                             |
| 15/09/2011 | Global Economic Challenges and Global Solutions: an Address at the Woodrow Wilson Center, By Christine Lagarde, Managing Director, International Monetary Fund                                                                                                             |
| 19/09/2011 | Remarks by Bob Traa, Senior IMF Resident Representative in Athens, Greece, Economist Conference                                                                                                                                                                            |
| 21/09/2011 | IMF High-Level Seminar "Commodity Price Volatility and Inclusive Growth in Low-Income Countries", Opening Remarks by Christine Lagarde - Managing Director, International Monetary Fund                                                                                    |
| 23/09/2011 | "The Path Forward—Act Now and Act Together", Opening Address to the 2011 Annual Meetings of the Boards of Governors of the World Bank Group and the International Monetary Fund, Christine Lagarde, Managing Director, International Monetary Fund                         |
| 25/09/2011 | The IMF and the International Monetary System: Lessons from the Crisis, Per Jacobsson Foundation Lecture by Axel Weber former President of the Deutsche Bundesbank                                                                                                         |
| 03/10/2011 | FAD/OAP Conference: Public Health Care Reform in Asia, Opening Remarks by Min Zhu, Deputy Managing Director, IMF                                                                                                                                                           |
| 12/10/2011 | Sustaining Development in Low-Income Asia: Infrastructure Investment and Financial Sector Development, Remarks by Naoyuki Shinohara, Deputy Managing Director, IMF at the IMF-JICA Joint Conference, Tokyo                                                                 |
| 15/10/2011 | Strengthening the Financial Stability Framework of the EU, Address by Ajai Chopra to the 2011 Dublin Economic Workshop -- Kenmare, October 15, 2011                                                                                                                        |
| 17/10/2011 | The Evolving Role of the IMF in the Global Economy, Remarks by Min Zhu, Deputy Managing Director, International Monetary Fund, Port Louis, Mauritius                                                                                                                       |
| 28/10/2011 | "Global Economic Challenges and Fostering Future Prosperity" Address at the University of Iceland by IMF Deputy Managing Director Nemat Shafik                                                                                                                             |
| 04/11/2011 | Presentation to the Asian Institute of Management by Naoyuki Shinohara, IMF Deputy Managing Director, The Asia-Pacific Economic Outlook and Policy Challenges in an Uncertain Global Environment                                                                           |
| 07/11/2011 | Global and Regional Policy Challenges—an Address at the State University of the Ministry of Finance                                                                                                                                                                        |
| 09/11/2011 | An Address to the 2011 International Finance Forum by Christine Lagarde, Managing Director, International Monetary Fund                                                                                                                                                    |
| 18/11/2011 | "Challenges of Budgetary and Financial Crisis in Europe", Presentation by Carlo Cottarelli, Director, Fiscal Affairs Department, International Monetary Fund                                                                                                               |
| 06/12/2011 | "The Arab Spring, One Year On" By Christine Lagarde, Managing Director, International Monetary Fund                                                                                                                                                                        |
| 07/12/2011 | International Tax Dialogue Conference on Taxation and Inequality, Opening Remarks by Deputy Managing Director Min Zhu                                                                                                                                                      |
| 09/12/2011 | Opening Remarks at the High-Level Regional Symposium on "Monitoring and Managing Financial Stability: Lessons From and For the FSAP" Min Zhu, Deputy Managing Director, IMF                                                                                                |
| 11/12/2011 | An Address at the 10th Anniversary of the World Trade Organization Accession by Naoyuki Shinohara, Deputy Managing Director, International Monetary Fund                                                                                                                   |
| 20/12/2011 | Africa's Future: Responding to Today's Global Economic Challenges - Speech By Christine Lagarde, Managing Director, International Monetary Fund                                                                                                                            |
| 21/12/2011 | Securing Niger's Economic Future in Uncertain Global Economic Times By Christine Lagarde, Managing Director, International Monetary Fund                                                                                                                                   |
| 16/01/2012 | Strengthening the Asia/IMF Relationship in a Highly Uncertain Global Environment, Speech at Asian Financial Forum by David Lipton, First Deputy Managing Director, International Monetary Fund, Hong Kong                                                                  |
| 23/01/2012 | "Global Challenges in 2012" By Christine Lagarde, Managing Director, International Monetary Fund                                                                                                                                                                           |
| 03/02/2012 | IMF-Japan High level Tax Seminar for Asian Countries "Emerging Taxation Issues in Asian Countries": Closing Remarks by Mr. Shinohara, IMF Deputy Managing Director                                                                                                         |
| 27/02/2012 | "The East African Community: The Next Decade" Opening Presentation at the East African Community Conference by Mr. Naoyuki Shinohara, Deputy Managing Director, International Monetary Fund                                                                                |
| 28/02/2012 | "The East African Community after 10 Years: Deepening EAC Integration" Closing Conference Remarks By Ms. Antoinette Sayeh, Director of African Department, International Monetary Fund                                                                                     |
| 01/03/2012 | "Global Challenges to Financial Stability: the Global Outlook and the Role of Macroprudential Policies" Speech by International Monetary Fund Deputy Managing Director Min Zhu                                                                                             |
| 08/03/2012 | "Structures, Processes and Governance in Tax Policy-Making" By Carlo Cottarelli                                                                                                                                                                                            |
| 13/03/2012 | Fiscal policy in advanced economies: fiscal adjustment, efficiency and growth                                                                                                                                                                                              |
| 18/03/2012 | Luncheon Address by Christine Lagarde, IMF Managing Director at the China Development Forum 2012 -- Beijing, Sunday, March 18                                                                                                                                              |
| 18/03/2012 | Guest Speech by Christine Lagarde, IMF Managing Director, at the Opening Ceremony of the China Development Forum 2012 -- Beijing, Sunday, March 18, 2012                                                                                                                   |
| 22/03/2012 | Enhancing Resilience to Shocks and Fostering Inclusive Growth in the Pacific Islands by Min Zhu, Deputy Managing Director, International Monetary Fund                                                                                                                     |

|            |                                                                                                                                                                                                                                                    |
|------------|----------------------------------------------------------------------------------------------------------------------------------------------------------------------------------------------------------------------------------------------------|
| 27/03/2012 | Global and Regional Economic Outlook and the Role of Integration in Asia, speech by Naoyuki Shinohara, IMF Deputy Managing Director                                                                                                                |
| 29/03/2012 | "Global and Regional Economic Outlook and Challenges for Central Banks after the Global Financial Crisis", Presentation at the 8th ASEAN Central Bank Governors' Meeting by Naoyuki Shinohara, IMF Deputy Managing Director, March 29, 2012        |
| 03/04/2012 | Cooperation and Connectedness-an Address to the Associated Press By Christine Lagarde, Managing Director, International Monetary Fund                                                                                                              |
| 12/04/2012 | Seizing the Moment- Thinking Beyond the Crisis, Address at the Brookings Institution By Christine Lagarde                                                                                                                                          |
| 17/04/2012 | IMF/CFP Policy Roundtable on the Future of Financial Regulation                                                                                                                                                                                    |
| 21/04/2012 | Banque de France Financial Stability Review on Public Debt—Special Address to Panel Discussion                                                                                                                                                     |
| 24/04/2012 | The Outlook for the Global Economy and for Asia, Presentation by Naoyuki Shinohara, Deputy Managing Director, International Monetary Fund                                                                                                          |
| 02/05/2012 | Asia's key trends, potentials, opportunities and outlook, Speech by Naoyuki Shinohara, IMF Deputy Managing Director                                                                                                                                |
| 04/05/2012 | Meeting with Asian Civil Society, Introductory Remarks by Naoyuki Shinohara, Deputy Managing Director, International Monetary Fund                                                                                                                 |
| 05/05/2012 | Reforming International Financial Safety Nets, Opening Remarks by Naoyuki Shinohara IMF Deputy Managing Director                                                                                                                                   |
| 07/05/2012 | Anchoring Stability to Sustain Higher and Better Growth                                                                                                                                                                                            |
| 10/05/2012 | "A Region in Change- Hopes and Challenges" Speech by Nemat Shafik, Deputy Managing Director, International Monetary Fund                                                                                                                           |
| 16/05/2012 | "The Legacy of Charlemagne—Wolfgang Schäuble and European Integration" By Christine Lagarde, Managing Director, International Monetary Fund                                                                                                        |
| 21/05/2012 | IMF 2012 Article IV Consultation with Italy, Press Conference of the IMF mission, Remarks By Reza Moghadam, Director, IMF European Department                                                                                                      |
| 23/05/2012 | Global Connections and Global Citizens—an Address to the Kennedy School By Christine Lagarde, Managing Director, International Monetary Fund                                                                                                       |
| 31/05/2012 | "Reviving Growth in Europe" By Deputy Managing Director Nemat Shafik, International Monetary Fund                                                                                                                                                  |
| 05/06/2012 | Latvia and the Baltics—a Story of Recovery By Christine Lagarde, Managing Director, International Monetary Fund                                                                                                                                    |
| 08/06/2012 | "Completing the Task: Financial Sector Reform for Stability and Growth" Address to the Annual Leaders' Dialogue Hosted by Süddeutsche Zeitung By Christine Lagarde, Managing Director of the International Monetary Fund                           |
| 08/06/2012 | Press Conference at the Conclusion of the 2012 Article IV Mission to China, Opening Remarks by David Lipton, IMF First Deputy Managing Director, Beijing                                                                                           |
| 12/06/2012 | "Back to Rio- the Road to a Sustainable Economic Future" By Christine Lagarde, Managing Director, International Monetary Fund                                                                                                                      |
| 28/06/2012 | 12th IMF Forum on Managing Sovereign Risk and Public Debt: "Managing Sovereign Debt: A Seismic Shift in Demand and Supply Dynamics?" Opening Remarks by Min Zhu, Deputy Managing Director, International Monetary Fund                             |
| 06/07/2012 | Partnership & Recovery - The Shared Path to Global Stability & Growth, Nikkei Symposium Keynote Speech by By Christine Lagarde, Managing Director of the International Monetary Fund                                                               |
| 12/07/2012 | New Perspectives on Asia's Role in the Global Economy, Inaugural Bank of Thailand Policy Forum – Dinner Speech By Christine Lagarde, IMF                                                                                                           |
| 12/07/2012 | Convergence, Crisis, and Capacity Building: The Joint Vienna Institute in the Transition Process By Nemat Shafik, Deputy Managing Director of the International Monetary Fund                                                                      |
| 13/09/2012 | Will Asia Remain Resilient to Global Economic Headwinds? Near-term Economic Prospects and Risks By Naoyuki Shinohara, Deputy Managing Director                                                                                                     |
| 24/09/2012 | Promises to Keep: The Policy Actions Needed to Secure Global Recovery By Christine Lagarde, Managing Director, International Monetary Fund, at the Peterson Institute for International Economics                                                  |
| 26/09/2012 | Japan's Growth Challenge—Special Case or Herald for the Future, Opening Remarks by David Lipton, First Deputy Managing Director, IMF, Seminar, International Monetary Fund, Washington D.C., September 26, 2012                                    |
| 27/09/2012 | Beyond the Growth Versus Austerity Debate: Three Smart Things To Do Together By José Viñals, Financial Counsellor and Director of the Monetary and Capital Markets Department                                                                      |
| 11/10/2012 | Opening Remarks by IMF Managing Director Christine Lagarde at the Signing Ceremony for 2012 Bilateral Borrowing Agreements                                                                                                                         |
| 12/10/2012 | Annual Meetings Speech: The Road Ahead—A Changing Global Economy, A Changing IMF, by Christine Lagarde                                                                                                                                             |
| 14/10/2012 | Bank of Japan-IMF High-Level Seminar "Challenges of the Global Financial System: Risks and Governance under Evolving Globalization", Opening Remarks By Christine Lagarde, Managing Director, International Monetary Fund, Tokyo, October 14, 2012 |
| 14/10/2012 | Deputy Managing Director Min Zhu's Opening Remarks at the Pacific Seminar                                                                                                                                                                          |
| 25/10/2012 | Global Financial Sector Reform: An Unfinished Agenda by Christine Lagarde, Managing Director, International Monetary Fund                                                                                                                          |
| 01/11/2012 | "European Fiscal Union: A Vision for the Long Run" By Carlo Cottarelli                                                                                                                                                                             |
| 09/11/2012 | Latin America: Building a Strong and Reliable Revenue Base, Mr. Shinohara's Opening Remarks for the Tax and Growth Seminar                                                                                                                         |
| 12/11/2012 | Resolving The Crisis And Restoring Healthy Growth: Why Deleveraging Matters? by David Lipton, IMF First Deputy Managing Director                                                                                                                   |
| 13/11/2012 | Enabling Economic Transformation in the Middle East and North Africa by David Lipton, IMF First Deputy Managing Director                                                                                                                           |
| 14/11/2012 | "Asia and the Promise of Economic Cooperation" By Christine Lagarde, Managing Director, International Monetary Fund                                                                                                                                |
| 20/11/2012 | "Multilateral Institutions, ASEAN, and East Asia in Addressing Economic and Financial Disorder" by Naoyuki Shinohara, Deputy Managing Director, International Monetary Fund                                                                        |
| 20/11/2012 | "Asia's Economic Integration: A Driver of Global Growth in the 21st Century" by Naoyuki Shinohara, Deputy Managing Director, International Monetary Fund                                                                                           |
| 13/12/2012 | "Fiscal Federations: Lessons for the Design of a European Fiscal Union" By Carlo Cottarelli                                                                                                                                                        |
| 05/01/2013 | "Malawi—Economic Rebirth, Renewed Partnerships", By Christine Lagarde, Managing Director, International Monetary Fund                                                                                                                              |

|            |                                                                                                                                                                                                                                 |
|------------|---------------------------------------------------------------------------------------------------------------------------------------------------------------------------------------------------------------------------------|
| 06/01/2013 | Panel on "Stimulus or Stymied? The Macroeconomics of Recessions" American Economic Association Meetings, San Diego, January 6, 2013 Presentation by Carlo Cottarelli                                                            |
| 07/01/2013 | "Toward a Second Ivoirien Miracle" By Christine Lagarde, Managing Director, International Monetary Fund                                                                                                                         |
| 09/01/2013 | "Unleashing the Economic Potential of the Maghreb—the Role of Foreign Investment" By Christine Lagarde, Managing Director, International Monetary Fund                                                                          |
| 23/01/2013 | "A New Global Economy for a New Generation" By Christine Lagarde, Managing Director, International Monetary Fund                                                                                                                |
| 28/01/2013 | Conference on Economic Transformation and Inclusive Growth in Frontier Asia                                                                                                                                                     |
| 18/02/2013 | Mountains of debt: the Cliffs, Slopes and Uncharted Territories of Today's Public Finances in Advanced Economies                                                                                                                |
| 07/03/2013 | Communication, Engagement, and Effective Economic Reform: The IMF Experience, By Nemat Shafik, Deputy Managing Director, International Monetary Fund, London                                                                    |
| 08/03/2013 | "Ireland and the European Union--Shared Determination, Shared Destiny" By Christine Lagarde, Managing Director, International Monetary Fund                                                                                     |
| 12/03/2013 | "Philippines: Fostering Stronger and more Inclusive Growth", Presentation by Anoop Singh at the Philippines Institute of Development Studies                                                                                    |
| 12/03/2013 | David Lipton speech on Financial Sector Regulatory Reform at the Chartered Financial Analyst (CFA) Society of Washington Annual Dinner, Hall of the Americas Ballroom, Organization of American States, Washington, DC          |
| 14/03/2013 | "Realizing the Aspirations of All Algerians" Townhall speech by Christine Lagarde, Managing Director of the International Monetary Fund                                                                                         |
| 19/03/2013 | "The Global Financial Sector—Transforming the Landscape" By Christine Lagarde, Managing Director, International Monetary Fund                                                                                                   |
| 27/03/2013 | "Energy Subsidy Reform: The Way Forward" Presentation by David Lipton, First Deputy Managing Director, International Monetary Fund                                                                                              |
| 03/04/2013 | 9th ASEAN Central Bank Governors' Meeting, Presentation by Naoyuki Shinohara, Deputy Managing Director, International Monetary Fund                                                                                             |
| 07/04/2013 | "Fulfilling the Asian Dream—Lasting Growth and Shared Prosperity" By Christine Lagarde, Managing Director, International Monetary Fund                                                                                          |
| 10/04/2013 | "The Global Policy Actions Needed to Stay Ahead of the Crisis" By Christine Lagarde, Managing Director, International Monetary Fund                                                                                             |
| 15/04/2013 | Speech at the 17th Economist Roundtable with the Government of Greece by Poul Thomsen, Deputy Director in the IMF's European Department                                                                                         |
| 25/04/2013 | "Global Prospects and Policy Challenges" by Deputy Managing Director Shinohara's Speech at the Japan Society, New York                                                                                                          |
| 25/04/2013 | Bellwether Europe 2013 Speech by David Lipton, First Deputy Managing Director, International Monetary Fund                                                                                                                      |
| 01/05/2013 | "Global Economic Prospects and the Implications for India" Speech to the Federation of Indian Chambers of Commerce and Industry (FICCI), New Delhi by Naoyuki Shinohara, Deputy Managing Director, International Monetary Fund  |
| 03/05/2013 | Opening Remarks by Naoyuki Shinohara, Deputy Managing Director, International Monetary Fund, at a Joint ADB-IMF-Reserve Bank of India Seminar on Managing Inflation in an Era of Commodity Price Volatility                     |
| 06/05/2013 | New Opportunities and New Risks: Prospects for Sub-Saharan Africa and Mozambique, Speech by David Lipton, First Deputy Managing Director, in Maputo                                                                             |
| 08/05/2013 | South Africa: Facing the Challenges of the Global Economy                                                                                                                                                                       |
| 15/05/2013 | "Together for a New Mali", Remarks by Mr. Min Zhu, Deputy Managing Director of the International Monetary Fund (IMF)                                                                                                            |
| 15/05/2013 | "Stability and Growth for Poverty Reduction" By Christine Lagarde, Managing Director, International Monetary Fund                                                                                                               |
| 20/05/2013 | "From Here to Eternity: The Outlook for Fiscal Adjustment in Advanced Economies" By Carlo Cottarelli                                                                                                                            |
| 03/06/2013 | "The Financial Crisis, Capital Flows, and Global Liquidity" Keynote Speech by Naoyuki Shinohara, Deputy Managing Director, International Monetary Fund, Bank of Korea International Conference 2013, Seoul, Korea, June 3, 2013 |
| 04/06/2013 | "Strong Laws and Institutions for a Strong Global Economy" by Christine Lagarde at the Washington Foreign Law Society                                                                                                           |
| 04/06/2013 | "Policy Steps Toward a Full-Speed Global Economy" By Christine Lagarde, Managing Director, International Monetary Fund                                                                                                          |
| 09/07/2013 | "Asia in the 21st Century: The Potential for Sri Lanka" Presentation by Anoop Singh at the Sri Lanka Economic Summit                                                                                                            |
| 16/07/2013 | Eastern Europe and Romania—The Path to Prosperity by Christine Lagarde in Bucharest                                                                                                                                             |
| 23/08/2013 | "The Global Calculus of Unconventional Monetary Policies" By Christine Lagarde, Managing Director, International Monetary Fund                                                                                                  |
| 16/09/2013 | "Making Macroprudential Policy Work" Remarks by José Viñals at Brookings                                                                                                                                                        |
| 17/09/2013 | "Economic Resilience in a Challenging International Environment", Opening remarks at the 2013 Nairobi Conference, by Antoinette M. Sayeh                                                                                        |
| 18/09/2013 | Conference on Harnessing Natural Resource Wealth for Inclusive Growth and Economic Development, Opening Remarks by Anoop Singh, Director of the Asia and Pacific Department                                                     |
| 19/09/2013 | "The Interconnected Global Economy: Challenges and Opportunities for the United States—and the World" By Christine Lagarde, Managing Director, International Monetary Fund                                                      |
| 20/09/2013 | APEC Finance Ministers' Meeting, Remarks by Naoyuki Shinohara, IMF Deputy Managing Director                                                                                                                                     |
| 20/09/2013 | "Caribbean Challenges, Growth, and Progress on the Small States Initiative" by Nemat (Minouche) Shafik, Deputy Managing Director, IMF                                                                                           |
| 24/09/2013 | "The Triple Challenge Facing the Global Economy"—an Address to the High-Level Forum on Sustainable Development by Christine Lagarde, Managing Director, International Monetary Fund                                             |
| 25/09/2013 | "The Path Toward Greater Financial Stability: Where Are We and What Needs to be Done?" By Naoyuki Shinohara, Deputy Managing Director, International Monetary Fund                                                              |
| 03/10/2013 | Managing the New Transitions in the Global Economy, an Address by Christine Lagarde Managing Director, International Monetary Fund, at George Washington University, Washington DC, October 3, 2013                             |
| 11/10/2013 | The Future Global Economy and the Future Fund, by Christine Lagarde Managing Director, International Monetary Fund                                                                                                              |

|            |                                                                                                                                                                                                               |
|------------|---------------------------------------------------------------------------------------------------------------------------------------------------------------------------------------------------------------|
| 28/10/2013 | "The Opportunities and Challenges of Financial Integration in West Africa" by Naoyuki Shinohara, Deputy Managing Director, International Monetary Fund                                                        |
| 29/10/2013 | "Abenomics Approaching Its One-Year Mark", Opening Remarks for IMF Seminar by Anoop Singh                                                                                                                     |
| 30/10/2013 | Asia and Pacific Regional Economic Update — Media Roundtable by Anoop Singh                                                                                                                                   |
| 31/10/2013 | Transitions in an Interconnected World and Germany's Role, by David Lipton, First Deputy Managing Director International Monetary Fund                                                                        |
| 07/11/2013 | Fourteenth Jacques Polak Annual Research Conference on "Crises: Yesterday and Today, by David Lipton, First Deputy Managing Director, IMF"                                                                    |
| 10/11/2013 | Addressing Challenges in Gulf Cooperation Council Economies, by Christine Lagarde, Managing Director, International Monetary Fund                                                                             |
| 21/11/2013 | Keynote Speech by Naoyuki Shinohara at the 49th SEACEN Governors' Conference and High-Level Seminar                                                                                                           |
| 22/11/2013 | Welcome Remarks at the High-Level Pacific Islands Conference Lifting Potential Growth in the Pacific Islands                                                                                                  |
| 25/11/2013 | Speech at The Economist Conference, "Cyprus on the Mend?" by Delia Velculescu, IMF Mission Chief for Cyprus                                                                                                   |
| 03/12/2013 | Cambodia at the New Frontier—an Address to the Royal School of Administration, by Christine Lagarde, Managing Director, International Monetary Fund                                                           |
| 05/12/2013 | "Smart Governance: Solutions for Today's Global Economy," by Nemat Shafik, Deputy Managing Director, IMF                                                                                                      |
| 05/12/2013 | Securing the Future for Korea-An Address to Seoul National University, By Christine Lagarde, Managing Director, International Monetary Fund                                                                   |
| 07/12/2013 | Building the Future of Myanmar—an Address to the Yangon Institute of Economics                                                                                                                                |
| 10/12/2013 | Outlook for Europe: Boosting Growth and Employment, by Christine Lagarde, Managing Director, International Monetary Fund                                                                                      |
| 10/12/2013 | Arab Policy Forum on Financial Inclusion: Addressing Challenges of Financial Inclusion in the Arab World, by Masood Ahmed, Director, Middle East and Central Asia Department, International Monetary Fund     |
| 11/12/2013 | Resuming Virtuous Financial Integration, by José Viñals, Financial Counsellor and Director, International Monetary Fund, Launch of the IMF-Staff Book "From Fragmentation to Financial Integration in Europe" |
| 06/01/2014 | Kenya at the Economic Frontier: Challenges and Opportunities, by Christine Lagarde, Managing Director, International Monetary Fund                                                                            |
| 09/01/2014 | Mali at the Dawn of the New Year: From Crisis to Recovery, by Christine Lagarde, Managing Director, International Monetary Fund                                                                               |
| 15/01/2014 | The Global Economy in 2014, by Christine Lagarde, Managing Director, International Monetary Fund                                                                                                              |
| 23/01/2014 | "Reflections on Macprudential Policy" By Naoyuki Shinohara, Deputy Managing Director, International Monetary Fund                                                                                             |
| 23/01/2014 | Unconventional Monetary Policies: Looking Ahead, Speech By Naoyuki Shinohara, Deputy Managing Director, International Monetary Fund                                                                           |
| 03/02/2014 | "A New Multilateralism for the 21st Century: the Richard Dimbleby Lecture" By Christine Lagarde, Managing Director, International Monetary Fund                                                               |
| 12/02/2014 | "Maastricht and the Crisis in Europe: Where We've Been and What We've Learned," By Reza Moghadam, Director, European Department, IMF                                                                          |
| 25/02/2014 | "Innovation, Technology and the 21st Century Global Economy" By Christine Lagarde, Managing Director, International Monetary Fund                                                                             |
| 28/02/2014 | Back to the Future: Lessons from Financial Crises, Key note speech by José Viñals at a conference on The Future of Asia's Finance                                                                             |
| 03/03/2014 | "Europe- The Path to Sustainable Economic Growth" by Christine Lagarde, Managing Director, International Monetary Fund                                                                                        |
| 13/03/2014 | "Fiscal Policy and Income Inequality," by David Lipton, First Deputy Managing Director, IMF, Washington, D.C., March 13, 2014                                                                                 |
| 23/03/2014 | China's Next Transformation: the Key Steps Forward, By Christine Lagarde Managing Director, International Monetary                                                                                            |
| 23/03/2014 | China's Youth: Global Leaders, Global Citizen, by Christine Lagarde, Managing Director, International Monetary Fund                                                                                           |
| 23/03/2014 | Opening Remarks at the China Development Forum                                                                                                                                                                |
| 02/04/2014 | The Road to Sustainable Global Growth—the Policy Agenda                                                                                                                                                       |
| 04/04/2014 | 10th ASEAN Central Bank Governors' Meeting (ACGM), Presentation by Naoyuki Shinohara, IMF Deputy Managing Director                                                                                            |
| 13/04/2014 | Opening Remarks by the Managing Director at the Conference on "Monetary Policy in the New Normal"; April 13, 2014                                                                                             |
| 21/04/2014 | The 5th IMF-Japan High level Tax Conference for Asian Countries "Emerging Taxation Issues for Asian Countries" Tokyo, Japan                                                                                   |
| 02/05/2014 | "Leveraging Fiscal Policy for Inclusive Growth" by Naoyuki Shinohara, Deputy Managing Director, International Monetary Fund                                                                                   |
| 08/05/2014 | The Arab Countries in Transition—Strengthening the Economic Middle by Christine Lagarde                                                                                                                       |
| 12/05/2014 | Building the Future: Jobs, Growth, & Fairness in the Arab World Concluding Remarks by Christine Lagarde                                                                                                       |
| 19/05/2014 | "Daring the Difference: The 3 L's of Women's Empowerment" By Christine Lagarde, Managing Director, International Monetary Fund                                                                                |
| 25/05/2014 | Navigating Monetary Policy in the New Normal, Monetary Policy in a Changing Financial Landscape, Speech by Christine Lagarde at the ECB Forum on Central Banking                                              |
| 27/05/2014 | Economic Inclusion and Financial Integrity—an Address to the Conference on Inclusive Capitalism, Speech by Christine Lagarde, Managing Director, International Monetary Fund                                  |
| 28/05/2014 | "From Deflation to Reflation? Japan's New Monetary Policy Framework, Effectiveness, and Broad Lessons" by David Lipton, First Deputy Managing Director, IMF                                                   |
| 29/05/2014 | Africa Rising - Building to the Future, Keynote Address by Christine Lagarde, Managing Director, IMF                                                                                                          |
| 03/06/2014 | Remarks by Naoyuki Shinohara, Deputy Managing Director of IMF, at World Economic Forum — Investing in East Asia, Manila, Philippines, May 21, 2014                                                            |

|            |                                                                                                                                                                                                                                                   |
|------------|---------------------------------------------------------------------------------------------------------------------------------------------------------------------------------------------------------------------------------------------------|
| 05/06/2014 | IMF, World Bank, Federal Reserve Board Fourteenth Annual International Conference on Policy Challenges for the Financial Sector, Opening Remarks by Naoyuki Shinohara, Deputy Managing Director, International Monetary Fund                      |
| 06/06/2014 | Empowerment—the Amartya Sen Lecture, By Christine Lagarde Managing Director, International Monetary Fund                                                                                                                                          |
| 09/06/2014 | Towards the Next Era of Growth—Reforms and Rebalancing                                                                                                                                                                                            |
| 10/06/2014 | Speech by IMF Director of European Department Reza Moghadam at Brussels Economic Forum                                                                                                                                                            |
| 11/06/2014 | Housing Markets, Financial Stability and the Economy                                                                                                                                                                                              |
| 25/06/2014 | High-Level Conference on the Macroeconomic Outlook for Mongolia, Opening Remarks, Naoyuki Shinohara, Deputy Managing Director, International Monetary Fund                                                                                        |
| 25/06/2014 | Dare to Dream—Structural Reforms in Mexico, Remarks by Christine Lagarde, Managing Director, IMF                                                                                                                                                  |
| 26/06/2014 | Empowerment Through Financial Inclusion, Address to the International Forum for Financial Inclusion by Christine Lagarde, Managing Director, International Monetary Fund                                                                          |
| 26/06/2014 | Africa Training Institute Opening Ceremony Ebene, Mauritius Remarks by Min Zhu, Deputy Managing Director, International Monetary Fund                                                                                                             |
| 27/06/2014 | The Caribbean and the IMF—Building a Partnership for the Future, by Christine Lagarde, Managing Director, IMF                                                                                                                                     |
| 02/07/2014 | Camdessus Central Banking Lecture Series—Inaugural Lecture, Opening Remarks by Christine Lagarde, Managing Director, International Monetary Fund                                                                                                  |
| 06/07/2014 | Investment for the Future—Higher Investment for Stronger Growth, Rencontres Economiques d'Aix-en-Provence, By Christine Lagarde, Managing Director, International Monetary Fund                                                                   |
| 09/07/2014 | Remarks delivered at the 18th Economist Roundtable with the Government of Greece by Rishi Goyal, Advisor in the IMF's European Department                                                                                                         |
| 18/07/2014 | Supporting the European Recovery in a Rapidly Changing World, By Christine Lagarde, Managing Director, International Monetary Fund                                                                                                                |
| 31/07/2014 | Promoting Responsible Energy Pricing, By Christine Lagarde, Managing Director, International Monetary Fund                                                                                                                                        |
| 12/09/2014 | 11th Asia-Europe Finance Ministers' Meeting (ASEM FinMM11) Milan, Italy, Opening Remarks by Naoyuki Shinohara, Deputy Managing Director, IMF                                                                                                      |
| 12/09/2014 | The Economic Power of Women's Empowerment, Keynote Speech By Christine Lagarde, Managing Director, International Monetary Fund                                                                                                                    |
| 19/09/2014 | Making the Most of Opportunities                                                                                                                                                                                                                  |
| 02/10/2014 | The Challenge Facing the Global Economy: New Momentum to Overcome a New Mediocre, by Christine Lagarde Managing Director, International Monetary Fund                                                                                             |
| 08/10/2014 | Challenges of Job-Rich and Inclusive Growth, By Christine Lagarde, Managing Director, International Monetary Fund                                                                                                                                 |
| 10/10/2014 | The IMF at 70: Making the Right Choices—Yesterday, Today, and Tomorrow by Christine Lagarde, Managing Director, IMF                                                                                                                               |
| 22/10/2014 | Remarks by Naoyuki Shinohara at the 21st APEC Finance Ministers' Meeting Beijing, China                                                                                                                                                           |
| 23/10/2014 | Unlocking Economic Growth, By Min Zhu, Deputy Managing Director, IMF                                                                                                                                                                              |
| 24/10/2014 | Building Market Economies in Europe: Lessons and Challenges after 25 Years of Transition, By David Lipton, First Deputy Managing Director, International Monetary Fund                                                                            |
| 29/10/2014 | Economic Diplomacy and the Need for a New Multilateralism by Christine Lagarde, Managing Director, International Monetary Fund                                                                                                                    |
| 04/11/2014 | Talking Points by Mark Lewis, IMF Mission Chief for Cyprus, for his participation in The Economist's 10th Cyprus Summit in Nicosia                                                                                                                |
| 18/11/2014 | The Second IMF Statistical Forum—Statistics for Policymaking by Christine Lagarde, Managing Director, International Monetary Fund                                                                                                                 |
| 20/11/2014 | 50th SEACEN Governors' Conference, Address by Naoyuki Shinohara, Deputy Managing Director, International Monetary Fund                                                                                                                            |
| 20/11/2014 | 50th Anniversary Special Address—Capital Flow Management and International Cooperation, Address by Naoyuki Shinohara, Deputy Managing Director, International Monetary Fund                                                                       |
| 05/12/2014 | Closing Remarks to the Fiscal Affairs Department's 50th Anniversary Conference on "Fiscal Affairs, Past and Future" by Vitor Gaspar, Director of Fiscal Affairs Department                                                                        |
| 05/12/2014 | Opening Address to the Conference on "Challenges for Securing Growth and Shared Prosperity in Latin America" by Christine Lagarde, Managing Director, International Monetary Fund                                                                 |
| 09/12/2014 | Building a Future for Italy's Youth—Challenging the Present, Daring the Future, Bocconi University Inaugural Speech, By Christine Lagarde, Managing Director, International Monetary Fund                                                         |
| 10/12/2014 | Managing House Price Booms: The Role of Macprudential Policies, Remarks at the IIM-Bangalore and IMF Conference on Housing Markets, Financial Stability and Growth, By Ratna Sahay, Deputy Director, Monetary and Capital Markets Department, IMF |
| 15/01/2015 | Three "Rosetta Moments" for the Global Economy in 2015 by Lagarde Christine, Managing Director, International Monetary Fund                                                                                                                       |
| 27/01/2015 | Rwanda—Taking On the Future, Staying Ahead of the Curve by Christine Lagarde, Managing Director, International Monetary Fund                                                                                                                      |
| 05/02/2015 | Statement by IMF Managing Director Christine Lagarde on the Catastrophe Containment and Relief Trust                                                                                                                                              |
| 10/02/2015 | Senegal on the Way to an Emerging Economy: Transformation, Inclusiveness, Equity by Christine Lagarde, IMF Managing Director                                                                                                                      |
| 18/02/2015 | Third Joint IMF-JICA Conference on Frontier and Developing Asia: Supporting Rapid and Inclusive Growth                                                                                                                                            |
| 23/02/2015 | Opening Remarks at the Conference on "Corporate Debt Bias: Economic Insights and Policy Options" by Vitor Gaspar, Director of Fiscal Affairs Department                                                                                           |
| 02/03/2015 | Managing Capital Flows: Lessons from Emerging Markets for Frontier Economies                                                                                                                                                                      |
| 05/03/2015 | Reflections on South Africa's Challenges and Opportunities for Reform                                                                                                                                                                             |
| 13/03/2015 | Moment of Opportunity—Delivering on Egypt's Aspirations by Christine Lagarde, IMF Managing Director                                                                                                                                               |

|            |                                                                                                                                                                                                                                     |
|------------|-------------------------------------------------------------------------------------------------------------------------------------------------------------------------------------------------------------------------------------|
| 16/03/2015 | Seizing India's Moment, by Christine Lagarde, IMF Managing Director                                                                                                                                                                 |
| 17/03/2015 | Spillovers from Unconventional Monetary Policy—Lessons for Emerging Markets, by Christine Lagarde, IMF Managing Director                                                                                                            |
| 19/03/2015 | ASEAN — The Challenges of Convergence and Integration, Remarks by David Lipton, First Deputy Managing Director, International Monetary Fund                                                                                         |
| 20/03/2015 | China and the Global Economy: Creating New Ingredients for Growth, by Christine Lagarde, IMF Managing Director                                                                                                                      |
| 22/03/2015 | Monetary Policy in the New Normal, Remarks for 2015 CDF Panel Discussion, by Christine Lagarde, IMF Managing Director                                                                                                               |
| 22/03/2015 | Opening Remarks at the 2015 China Development Forum, by Christine Lagarde, IMF Managing Director                                                                                                                                    |
| 07/04/2015 | The Case for Supporting Ukrainian Economic Reforms, Remarks by David Lipton, IMF First Deputy Managing Director, delivered at Peterson Institute, April 7, 2015                                                                     |
| 09/04/2015 | "Lift Growth Today, Tomorrow, Together," Speech by Christine Lagarde, Managing Director, IMF                                                                                                                                        |
| 17/04/2015 | World Bank Climate Ministerial Meeting: IMF Managing Director's Remarks                                                                                                                                                             |
| 17/04/2015 | Remarks of IMF Managing Director Christine Lagarde--High-Level Ebola Meeting: The Road to Recovery                                                                                                                                  |
| 23/04/2015 | "Reinvigorate Trade to Boost Global Economic Growth," By Christine Lagarde, Managing Director, IMF                                                                                                                                  |
| 06/05/2015 | Ethics and Finance—Aligning Financial Incentives with Societal Objectives, Speech by Christine Lagarde, Managing Director of the IMF, delivered at the Event hosted by the Institute for New Economic Thinking: Finance and Society |
